# Supplementary material
Source: HighWire-hosted journal article supplement (https://www.cmaj.ca/highwire/filestream/150421/field_highwire_adjunct_files/0/230274-res-1-at.pdf)
Supplement: 230274-res-1-at.pdf [file 230274-res-1-at.pdf]

## Contents

### SUPPLEMENTARY MATERIAL

|                                                                                                                                                                                       |    |
|---------------------------------------------------------------------------------------------------------------------------------------------------------------------------------------|----|
| eAppendix 1: Summary of the search strategy for trials of remote CBT vs. in-person CBT .....                                                                                          | 2  |
| eTable 1: Therapist involvement in remote CBT and safety outcomes for included trials.....                                                                                            | 11 |
| eTable 2: Compliance rates with therapist-guided remote and in-person CBT within trials .....                                                                                         | 21 |
| eTable 3: Subgroup analysis using univariable meta-regression with Knapp and Hartung modification to the variance of the estimated effect (SMD) .....                                 | 24 |
| eFigure 1: Contour enhanced funnel plot of patient compliance rates (Moderate threshold) .....                                                                                        | 25 |
| eFigure 2: Contour enhanced funnel plot of patient compliance rates (High threshold).....                                                                                             | 26 |
| eTable 4: Risk of Bias .....                                                                                                                                                          | 27 |
| eTable 5: Registered trial protocols among studies eligible for review (n=54).....                                                                                                    | 28 |
| eTable 6: Summary table of primary outcome data .....                                                                                                                                 | 31 |
| eFigure 3: Contour-enhanced funnel plot of primary outcome effect estimates .....                                                                                                     | 34 |
| eFigure 4: Effect on primary outcome among patients that received in-person vs. remote CBT, using end-of-study scores.....                                                            | 35 |
| eFigure 5: Subgroup analysis for effectiveness and clinical condition .....                                                                                                           | 36 |
| eFigure 6: Subgroup analysis for individual vs. group CBT and clinical condition.....                                                                                                 | 37 |
| eFigure 7: Subgroup analysis for individual vs. group CBT and overall risk of bias.....                                                                                               | 38 |
| eFigure 8: Subgroup analysis for effectiveness and risk of bias for randomization sequence.....                                                                                       | 39 |
| eFigure 9: Subgroup analysis for effectiveness and risk of bias for missing outcome data .....                                                                                        | 40 |
| eFigure 10: Subgroup analysis for effectiveness and risk of bias for measurement outcome.....                                                                                         | 41 |
| eFigure 11: Subgroup analysis for effectiveness and risk of bias for selection of the reported results.....                                                                           | 42 |
| eFigure 12: Meta-regression for length of follow-up and treatment effect.....                                                                                                         | 43 |
| eFigure 13: Meta-regression for length of follow-up and treatment effects without outlier.....                                                                                        | 44 |
| eFigure 14: Reduction in depressive symptoms on the 63-point Beck Depression Inventory-II among patients with depression who received therapist-guided, remote vs. in-person CBT..... | 45 |

## eAppendix 1: Summary of the search strategy for trials of remote CBT vs. in-person CBT

July 4, 2023

|                         |       |
|-------------------------|-------|
| MEDLINE                 | 7880  |
| Embase                  | 8715  |
| PsycInfo                | 5189  |
| CINAHL                  | 3371  |
| Cochrane                | 11656 |
| Subtotal                | 36811 |
| -dupes and already seen | 17696 |
| Total                   | 19115 |

### MEDLINE (OVID)

Database: OVID Medline Epub Ahead of Print, In-Process & Other Non-Indexed Citations, Ovid MEDLINE(R) Daily and Ovid MEDLINE(R) 1946 to Present

Search Strategy:

- 
- 1 Internet-Based Intervention/ (1130)
  - 2 Internet/ (81328)
  - 3 (internet or computer or computerized).mp. [mp=title, book title, abstract, original title, name of substance word, subject heading word, floating sub-heading word, keyword heading word, organism supplementary concept word, protocol supplementary concept word, rare disease supplementary concept word, unique identifier, synonyms, population supplementary concept word, anatomy supplementary concept word] (982476)
  - 4 (virtual or online).mp. [mp=title, book title, abstract, original title, name of substance word, subject heading word, floating sub-heading word, keyword heading word, organism supplementary concept word, protocol supplementary concept word, rare disease supplementary concept word, unique identifier, synonyms, population supplementary concept word, anatomy supplementary concept word] (310066)
  - 5 exp Telemedicine/ (44775)
  - 6 exp Telephone/ (35600)
  - 7 Videotape Recording/ (11647)
  - 8 (telebehavioral or telehealth or telephone or phone or videoconferenc\*).mp. [mp=title, book title, abstract, original title, name of substance word, subject heading word, floating sub-heading word, keyword heading word, organism supplementary concept word, protocol supplementary concept word, rare disease supplementary concept word, unique identifier, synonyms, population supplementary concept word, anatomy supplementary concept word] (124631)
  - 9 (telepsycholog\* or teletherap\*).mp. [mp=title, book title, abstract, original title, name of substance word, subject heading word, floating sub-heading word, keyword heading word, organism supplementary concept word, protocol supplementary concept word, rare disease supplementary concept word, unique identifier, synonyms, population supplementary concept word, anatomy supplementary concept word] (6109)

- 10 or/1-9 (1365582)
- 11 exp Cognitive Behavioral Therapy/ (36523)
- 12 ((cognitive or behavio?r\*) adj3 therapy).mp,jw. (82784)
- 13 Psychotherapy/ (57783)
- 14 Psychotherapy, Group/ (14486)
- 15 ((psychological or psychotherap\*) adj3 (treatment or intervention)).mp. [mp=title, book title, abstract, original title, name of substance word, subject heading word, floating sub-heading word, keyword heading word, organism supplementary concept word, protocol supplementary concept word, rare disease supplementary concept word, unique identifier, synonyms, population supplementary concept word, anatomy supplementary concept word] (15934)
- 16 or/11-15 (159885)
- 17 10 and 16 (13890)
- 18 randomized controlled trial.pt. (595826)
- 19 controlled clinical trial.pt. (95352)
- 20 randomi?ed.ab. (726807)
- 21 placebo.ab. (239558)
- 22 drug therapy.fs. (2604360)
- 23 randomly.ab. (411598)
- 24 trial.ab. (654619)
- 25 groups.ab. (2538009)
- 26 or/18-25 (5716732)
- 27 exp animals/ not humans.sh. (5135842)
- 28 26 not 27 (4991464)
- 29 17 and 28 (7880)

Embase (OVID)

Database: Embase <1974 to 2023 July 03>

Search Strategy:

- 
- 1 internet/ or web-based intervention/ (126181)
  - 2 (internet or computer or computerized).mp. (1985554)
  - 3 (virtual or online).mp. (436737)
  - 4 exp telemedicine/ (71382)
  - 5 exp telephone/ (46002)
  - 6 videorecording/ (119498)
  - 7 (telebehavioral or telehealth or telephone or phone or videoconferenc\*).mp. (207215)
  - 8 (telepsycholog\* or teletherap\*).mp. [mp=title, abstract, heading word, drug trade name, original title, device manufacturer, drug manufacturer, device trade name, keyword heading word, floating subheading word, candidate term word] (2652)
  - 9 or/1-8 (2621218)
  - 10 exp cognitive behavioral therapy/ (26781)
  - 11 ((cognitive or behavio?r\*) adj3 therapy).mp,jw. (126257)
  - 12 psychotherapy/ (96659)
  - 13 ((psychological or psychotherap\*) adj3 (treatment or intervention)).mp. (23325)
  - 14 or/10-13 (219230)
  - 15 9 and 14 (21728)
  - 16 randomized controlled trial/ (791717)

- 17 Controlled clinical study/ (469547)
- 18 random\$.ti,ab. (1983466)
- 19 randomization/ (99532)
- 20 intermethod comparison/ (298725)
- 21 placebo.ti,ab. (367950)
- 22 (compare or compared or comparison).ti. (606946)
- 23 ((evaluated or evaluate or evaluating or assessed or assess) and (compare or compared or comparing or comparison)).ab. (2787889)
- 24 (open adj label).ti,ab. (109969)
- 25 ((double or single or doubly or singly) adj (blind or blinded or blindly)).ti,ab. (275749)
- 26 double blind procedure/ (211712)
- 27 parallel group\$1.ti,ab. (32447)
- 28 (crossover or cross over).ti,ab. (125199)
- 29 ((assign\$ or match or matched or allocation) adj5 (alternate or group\$1 or intervention\$1 or patient\$1 or subject\$1 or participant\$1)).ti,ab. (417899)
- 30 (assigned or allocated).ti,ab. (492326)
- 31 (controlled adj7 (study or design or trial)).ti,ab. (454371)
- 32 (volunteer or volunteers).ti,ab. (283319)
- 33 human experiment/ (656220)
- 34 trial.ti. (406596)
- 35 or/16-34 (6355050)
- 36 (random\$ adj sampl\$ adj7 ("cross section\$" or questionnaire\$1 or survey\$ or database\$1)).ti,ab. not (comparative study/ or controlled study/ or randomi?ed controlled.ti,ab. or randomly assigned.ti,ab.) (9498)
- 37 Cross-sectional study/ not (randomized controlled trial/ or controlled clinical study/ or controlled study/ or randomi?ed controlled.ti,ab. or control group\$1.ti,ab.) (351572)
- 38 (((case adj control\$) and random\$) not randomi?ed controlled).ti,ab. (21724)
- 39 (Systematic review not (trial or study)).ti. (264882)
- 40 (nonrandom\$ not random\$).ti,ab. (19034)
- 41 "Random field\$.ti,ab. (2970)
- 42 (random cluster adj3 sampl\$).ti,ab. (1554)
- 43 (review.ab. and review.pt.) not trial.ti. (1128244)
- 44 "we searched".ab. and (review.ti. or review.pt.) (50268)
- 45 "update review".ab. (139)
- 46 (databases adj4 searched).ab. (63366)
- 47 (rat or rats or mouse or mice or swine or porcine or murine or sheep or lambs or pigs or piglets or rabbit or rabbits or cat or cats or dog or dogs or cattle or bovine or monkey or monkeys or trout or marmoset\$1).ti. and animal experiment/ (1232046)
- 48 Animal experiment/ not (human experiment/ or human/) (2588267)
- 49 or/36-48 (4361068)
- 50 35 not 49 (5607504)
- 51 15 and 50 (8715)

PsycInfo (OVID)

Database: APA PsycInfo <1806 to June Week 4 2023>

Search Strategy:

-----

- 1 internet/ (31113)
- 2 online therapy/ (4203)
- 3 (internet or computer or computerized).mp. (230999)
- 4 (virtual or online).mp. [mp=title, abstract, heading word, table of contents, key concepts, original title, tests & measures, mesh word] (158293)
- 5 exp telemedicine/ (13168)
- 6 exp telephone systems/ (9972)
- 7 exp Videotapes/ (2612)
- 8 (telebehavioral or telehealth or telephone or phone or videoconferenc\*).mp. (46647)
- 9 (telepsycholog\* or teletherap\*).mp. [mp=title, abstract, heading word, table of contents, key concepts, original title, tests & measures, mesh word] (600)
- 10 or/1-9 (385811)
- 11 exp Cognitive Behavior Therapy/ (26917)
- 12 ((cognitive or behavio?r\*) adj3 therapy).mp,jw. (98240)
- 13 exp Psychotherapy/ (222207)
- 14 ((psychological or psychotherap\*) adj3 (treatment or intervention)).mp. (23179)
- 15 or/11-14 (312274)
- 16 10 and 15 (15063)
- 17 limit 16 to "therapy (best balance of sensitivity and specificity)" (3420)
- 18 (double-blind or random: assigned or control).tw. (549103)
- 19 exp Clinical Trials/ (13626)
- 20 (controlled adj3 trial\*).mp. (63994)
- 21 (clinical adj2 trial\*).mp. (54152)
- 22 (randomi?ed adj7 trial\*).mp. (76239)
- 23 or/18-22 (621692)
- 24 16 and 23 (5189)
- 25 17 or 24 (5189)

CINAHL (EBSCO)

Tuesday, July 04, 2023 4:59:13 PM

| #   | Query                                                                                                         | Limiters/Expanders            | Last Run Via                                                                                        | Results   |
|-----|---------------------------------------------------------------------------------------------------------------|-------------------------------|-----------------------------------------------------------------------------------------------------|-----------|
| S31 | S15 AND S30                                                                                                   | Search modes - Boolean/Phrase | Interface - EBSCOhost<br>Research Databases<br>Search Screen - Advanced Search<br>Database - CINAHL | 3,371     |
| S30 | S16 OR S17 OR S18<br>OR S19 OR S20 OR<br>S21 OR S22 OR S23<br>OR S24 OR S25 OR<br>S26 OR S27 OR S28<br>OR S29 | Search modes - Boolean/Phrase | Interface - EBSCOhost<br>Research Databases<br>Search Screen - Advanced Search<br>Database - CINAHL | 1,009,330 |

|     |                                                            |                               |                                                                                                     |         |
|-----|------------------------------------------------------------|-------------------------------|-----------------------------------------------------------------------------------------------------|---------|
| S29 | MH (CROSSOVER DESIGN) OR MH (COMPARATIVE STUDIES)          | Search modes - Boolean/Phrase | Interface - EBSCOhost<br>Research Databases<br>Search Screen - Advanced Search<br>Database - CINAHL | 474,227 |
| S28 | AB (CONTROL W5 GROUP)                                      | Search modes - Boolean/Phrase | Interface - EBSCOhost<br>Research Databases<br>Search Screen - Advanced Search<br>Database - CINAHL | 143,678 |
| S27 | PT (randomized controlled trial)                           | Search modes - Boolean/Phrase | Interface - EBSCOhost<br>Research Databases<br>Search Screen - Advanced Search<br>Database - CINAHL | 150,517 |
| S26 | MH (placebos)                                              | Search modes - Boolean/Phrase | Interface - EBSCOhost<br>Research Databases<br>Search Screen - Advanced Search<br>Database - CINAHL | 13,682  |
| S25 | MH (sample size) AND AB (assigned OR allocated OR control) | Search modes - Boolean/Phrase | Interface - EBSCOhost<br>Research Databases<br>Search Screen - Advanced Search<br>Database - CINAHL | 4,409   |
| S24 | TI (trial)                                                 | Search modes - Boolean/Phrase | Interface - EBSCOhost<br>Research Databases<br>Search Screen - Advanced Search<br>Database - CINAHL | 181,144 |
| S23 | AB (random*)                                               | Search modes - Boolean/Phrase | Interface - EBSCOhost<br>Research Databases<br>Search Screen - Advanced Search<br>Database - CINAHL | 397,004 |
| S22 | TI (randomised OR randomized)                              | Search modes - Boolean/Phrase | Interface - EBSCOhost<br>Research Databases<br>Search Screen - Advanced Search<br>Database - CINAHL | 140,942 |
| S21 | MH cluster sample                                          | Search modes - Boolean/Phrase | Interface - EBSCOhost<br>Research Databases<br>Search Screen - Advanced                             | 5,186   |

|     |                                                                      |                               |                                                                                                     |         |
|-----|----------------------------------------------------------------------|-------------------------------|-----------------------------------------------------------------------------------------------------|---------|
|     |                                                                      |                               | Search Database - CINAHL                                                                            |         |
| S20 | MH pretest-posttest design                                           | Search modes - Boolean/Phrase | Interface - EBSCOhost<br>Research Databases<br>Search Screen - Advanced Search<br>Database - CINAHL | 52,501  |
| S19 | MH random assignment                                                 | Search modes - Boolean/Phrase | Interface - EBSCOhost<br>Research Databases<br>Search Screen - Advanced Search<br>Database - CINAHL | 79,210  |
| S18 | MH single-blind studies                                              | Search modes - Boolean/Phrase | Interface - EBSCOhost<br>Research Databases<br>Search Screen - Advanced Search<br>Database - CINAHL | 15,943  |
| S17 | MH double-blind studies                                              | Search modes - Boolean/Phrase | Interface - EBSCOhost<br>Research Databases<br>Search Screen - Advanced Search<br>Database - CINAHL | 53,950  |
| S16 | MH randomized controlled trials                                      | Search modes - Boolean/Phrase | Interface - EBSCOhost<br>Research Databases<br>Search Screen - Advanced Search<br>Database - CINAHL | 136,735 |
| S15 | S9 AND S14                                                           | Search modes - Boolean/Phrase | Interface - EBSCOhost<br>Research Databases<br>Search Screen - Advanced Search<br>Database - CINAHL | 7,753   |
| S14 | S10 OR S11 OR S12 OR S13                                             | Search modes - Boolean/Phrase | Interface - EBSCOhost<br>Research Databases<br>Search Screen - Advanced Search<br>Database - CINAHL | 71,658  |
| S13 | TX ((psychological or psychotherap*) N3 (treatment or intervention)) | Search modes - Boolean/Phrase | Interface - EBSCOhost<br>Research Databases<br>Search Screen - Advanced Search<br>Database - CINAHL | 13,986  |

|     |                                                                                   |                                  |                                                                                                        |         |
|-----|-----------------------------------------------------------------------------------|----------------------------------|--------------------------------------------------------------------------------------------------------|---------|
| S12 | (MH "Psychotherapy")<br>OR (MH<br>"Psychotherapy,<br>Group")                      | Search modes -<br>Boolean/Phrase | Interface - EBSCOhost<br>Research Databases<br>Search Screen - Advanced<br>Search<br>Database - CINAHL | 28,704  |
| S11 | TX ((cognitive or<br>behavio?r*) N3 therapy)                                      | Search modes -<br>Boolean/Phrase | Interface - EBSCOhost<br>Research Databases<br>Search Screen - Advanced<br>Search<br>Database - CINAHL | 30,086  |
| S10 | (MH "Cognitive<br>Therapy+")                                                      | Search modes -<br>Boolean/Phrase | Interface - EBSCOhost<br>Research Databases<br>Search Screen - Advanced<br>Search<br>Database - CINAHL | 29,037  |
| S9  | S1 OR S2 OR S3 OR S4<br>OR S5 OR S6 OR S7<br>OR S8                                | Search modes -<br>Boolean/Phrase | Interface - EBSCOhost<br>Research Databases<br>Search Screen - Advanced<br>Search<br>Database - CINAHL | 463,441 |
| S8  | TX telepsycholog* or<br>teletherap*                                               | Search modes -<br>Boolean/Phrase | Interface - EBSCOhost<br>Research Databases<br>Search Screen - Advanced<br>Search<br>Database - CINAHL | 286     |
| S7  | TX telebehavioral or<br>telehealth or telephone<br>or phone or<br>videoconferenc* | Search modes -<br>Boolean/Phrase | Interface - EBSCOhost<br>Research Databases<br>Search Screen - Advanced<br>Search<br>Database - CINAHL | 94,674  |
| S6  | "videotape"                                                                       | Search modes -<br>Boolean/Phrase | Interface - EBSCOhost<br>Research Databases<br>Search Screen - Advanced<br>Search<br>Database - CINAHL | 1,058   |
| S5  | (MH "Telephone+")                                                                 | Search modes -<br>Boolean/Phrase | Interface - EBSCOhost<br>Research Databases<br>Search Screen - Advanced<br>Search<br>Database - CINAHL | 27,674  |
| S4  | (MH "Telemedicine+")                                                              | Search modes -<br>Boolean/Phrase | Interface - EBSCOhost<br>Research Databases<br>Search Screen - Advanced                                | 19,636  |



|    |                                                       |                               |                                                                                                     |         |
|----|-------------------------------------------------------|-------------------------------|-----------------------------------------------------------------------------------------------------|---------|
|    |                                                       |                               | Search Database - CINAHL                                                                            |         |
| S3 | TX virtual or online                                  | Search modes - Boolean/Phrase | Interface - EBSCOhost<br>Research Databases<br>Search Screen - Advanced Search<br>Database - CINAHL | 145,647 |
| S2 | TX internet or computer or computerized               | Search modes - Boolean/Phrase | Interface - EBSCOhost<br>Research Databases<br>Search Screen - Advanced Search<br>Database - CINAHL | 259,548 |
| S1 | (MH "Internet") OR (MH "Internet-Based Intervention") | Search modes - Boolean/Phrase | Interface - EBSCOhost<br>Research Databases<br>Search Screen - Advanced Search<br>Database - CINAHL | 54,326  |

#### Cochrane Library (Wiley)

Search Name: 2023-07-04 internet telephone CBT

Date Run: 04/07/2023 23:38:09

Comment:

#### ID Search Hits

- #1 MeSH descriptor: [Internet-Based Intervention] explode all trees 556
- #2 MeSH descriptor: [Internet] explode all trees 6180
- #3 (internet or computer or computerized) 77165
- #4 (virtual or online) 59692
- #5 MeSH descriptor: [Telemedicine] explode all trees 4250
- #6 MeSH descriptor: [Telephone] explode all trees 6121
- #7 MeSH descriptor: [Videotape Recording] explode all trees 1056
- #8 telebehavioral or telehealth or telephone or phone or videoconferenc\* 46394
- #9 telepsycholog\* or teletherap\* 345
- #10 #1 or #2 or #3 or #4 or #5 or #6 or #7 or #8 or #9 163156
- #11 MeSH descriptor: [Cognitive Behavioral Therapy] explode all trees 12963
- #12 ((cognitive or behavio?r\*) NEAR/3 therapy) 39811
- #13 MeSH descriptor: [Psychotherapy] explode all trees 33417
- #14 MeSH descriptor: [Psychotherapy, Group] explode all trees 4064
- #15 ((psychological or psychotherap\*) NEAR/3 (treatment or intervention)) 9989
- #16 #11 or #12 or #13 or #14 or #15 60098
- #17 #10 and #16 in Trials 11656

PRISMA flow diagram of initial study selection (May 11, 2022)

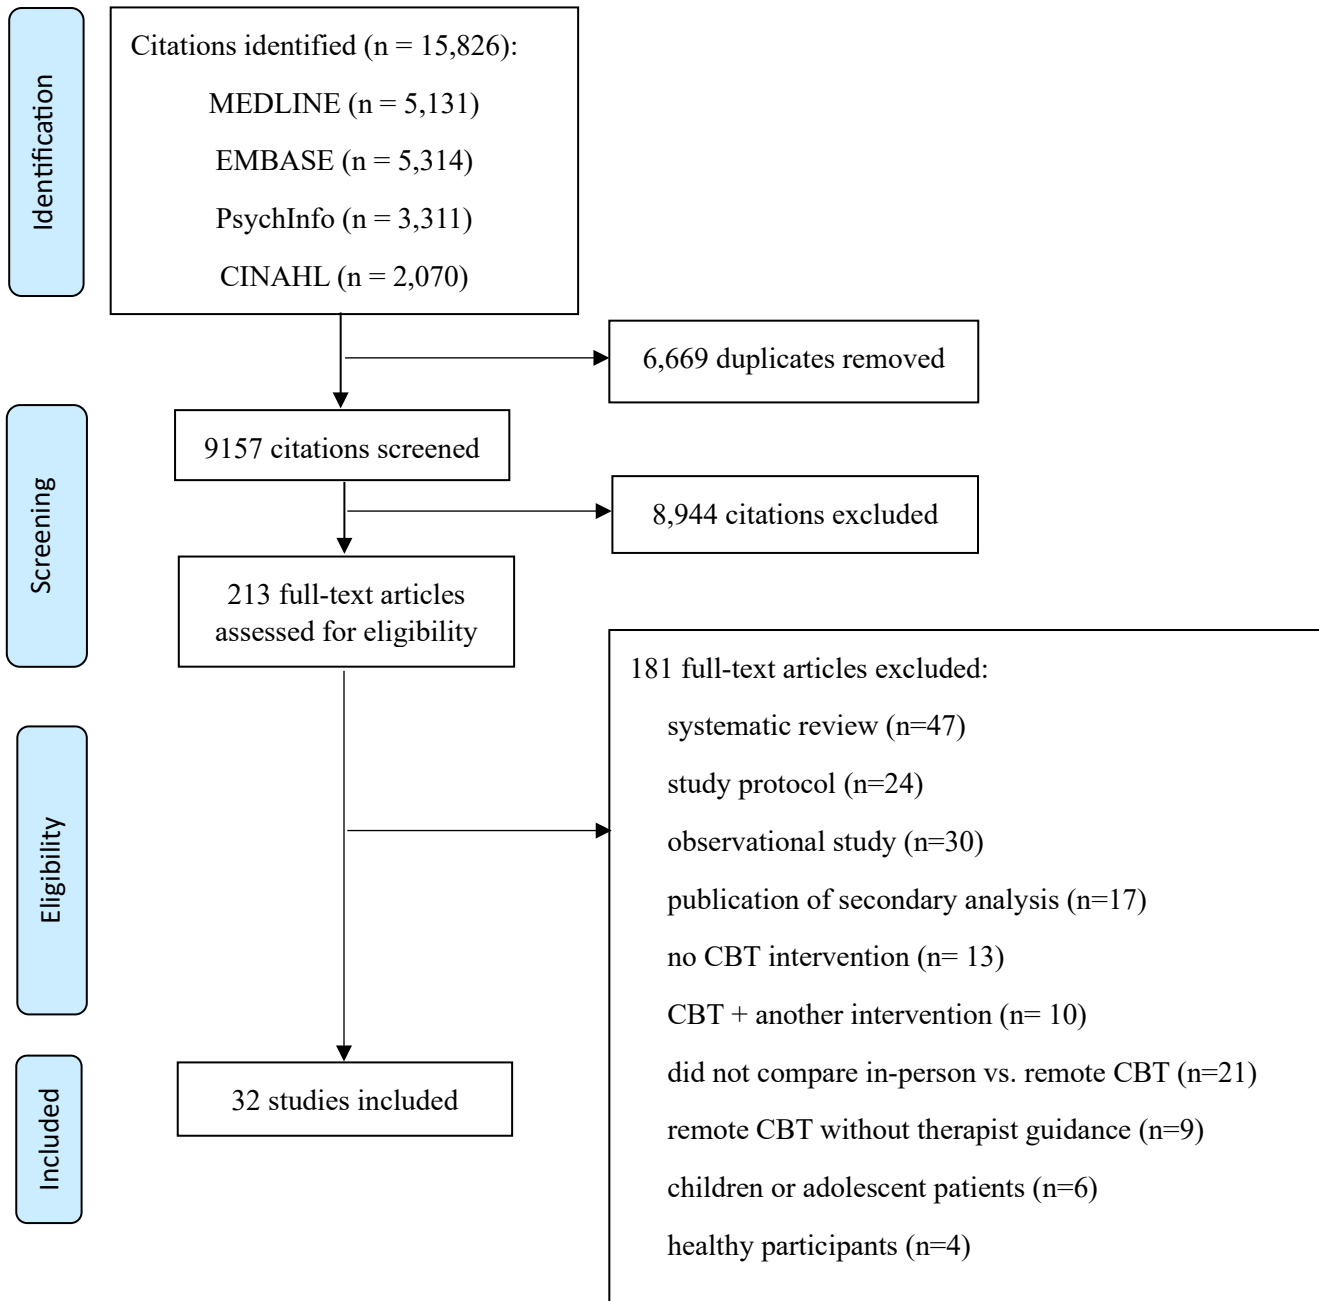

**eTable 1: Therapist involvement in remote CBT and safety outcomes for included trials**

| Study           | Clinical Condition | Type of sessions   | Type of remote CBT         | Involvement of therapist in on-line sessions                                                                                                                                                                                                                                                                                                                         | Safety Data                                                                                                                                                                                                                                                                                                                                                                        |
|-----------------|--------------------|--------------------|----------------------------|----------------------------------------------------------------------------------------------------------------------------------------------------------------------------------------------------------------------------------------------------------------------------------------------------------------------------------------------------------------------|------------------------------------------------------------------------------------------------------------------------------------------------------------------------------------------------------------------------------------------------------------------------------------------------------------------------------------------------------------------------------------|
| Heapy, 2017     | Chronic back pain  | Individual therapy | Interactive voice response | The IVR-CBT therapists reviewed the IVR-reported information and recorded 2-to 5-minute personalized feedback patterned after prior studies using IVR. Feedback was delivered weekly during participants' regular IVR assessments.                                                                                                                                   | Forty-six participants experienced 92 related and unrelated adverse events (AEs) (IVR-CBT, 40; in-person CBT, 52). Most related AEs were increased pain from exercise. The number of AEs was not significantly different by treatment group (P = 0.44).<br><br>Two serious AEs were reported, but judged by the institutional review board to be unrelated to study participation. |
| Anderson, 2013  | Depression         | Group therapy      | iCB                        | The treatment was guided by an identified Internet-therapist and patients were instructed to submit homework assignments each Sunday after which they received personalized feedback within 24h. All contact with the patients was handled via a secure online contact management system resembling Internet banking.                                                | No AEs were reported as a direct function of treatment                                                                                                                                                                                                                                                                                                                             |
| Andrews, 2011   | Social phobia      | Group therapy      | iCBT                       | Each participant in the iCBT arm received emails and telephone calls in addition to those that are automated. This required a total of 18 min per patient of clinician time per online session.                                                                                                                                                                      | There were no AEs reported.                                                                                                                                                                                                                                                                                                                                                        |
| Axelsson, 2020  | Health anxiety     | Individual therapy | iCBT                       | Patients could communicate freely with their therapist by way of an email-like system and expect a reply within 48 hours on weekdays. The treatment was communicated via a self-help text divided into 12 chapters (i.e., modules). Patients were encouraged to complete 1 iCBT module per week, and patients received feedback from the therapist after each module | At least 1 adverse event was reported by 19 of 97 patients in iCBT (20%) and 17 of 97 patients in face-to-face CBT (18%). This difference was not significant.<br><br>The most commonly reported type of adverse event in both treatments was increased anxiety or stress (16 [16%] vs 14 [14%]).<br><br>No serious adverse events were reported                                   |
| Bergström, 2010 | Panic disorder     | Group therapy      | iCBT                       | Each module ended with a number of questions to be answered by the patient through interactive forms (e.g., homework assignments). After reviewing their answers, the psychologist gave access to the next module and provided feedback. At any                                                                                                                      | NR                                                                                                                                                                                                                                                                                                                                                                                 |

|                    |                               |                    |                        |                                                                                                                                                                                                                                                                                                                                                                                                                                                                                                                                                                              |                                    |
|--------------------|-------------------------------|--------------------|------------------------|------------------------------------------------------------------------------------------------------------------------------------------------------------------------------------------------------------------------------------------------------------------------------------------------------------------------------------------------------------------------------------------------------------------------------------------------------------------------------------------------------------------------------------------------------------------------------|------------------------------------|
|                    |                               |                    |                        | <p>moment the patient could post a message if he or she needed further help. Messages were answered within 24 hours on regular weekdays. No other contact than by e-mail between patient and psychologist took place during treatment.</p> <p>The total number of e-mails sent by therapists during treatment was 555 (mean per patient: 11.3, SD = 4.3). The total average therapist time spent per patient in the Internet treatment was 35.4 minutes (SD = 19.0). That is, this was the mean amount of time that therapists used to answer e-mails from each patient.</p> |                                    |
| Alegría, 2014      | Depression                    | Individual therapy | Telephone-based CBT    | Treatment provided in real time over the telephone. The therapist involvement was the same as in-person CBT.                                                                                                                                                                                                                                                                                                                                                                                                                                                                 | NR                                 |
| Franklin, 2018     | Trauma-related insomnia       | Group therapy      | Telephone-based CBT    | Treatment provided in real time over the telephone. The therapist involvement was the same as in-person CBT.                                                                                                                                                                                                                                                                                                                                                                                                                                                                 | NR                                 |
| Frueh, 2007        | PTSD                          | Group therapy      | videoconferencing      | Treatment provided in real time over the videoconference. The therapist involvement was the same as in-person CBT.                                                                                                                                                                                                                                                                                                                                                                                                                                                           | NR                                 |
| Maieritsch, 2016   | PTSD                          | Individual therapy | video-teleconferencing | Treatment provided in real time over VTC. The therapist involvement was the same as in-person CBT.                                                                                                                                                                                                                                                                                                                                                                                                                                                                           | NR                                 |
| Liu, 2020          | PTSD                          | Group therapy      | videoconferencing      | Treatment provided in real time over VTC. The therapist involvement was the same as in-person CBT.                                                                                                                                                                                                                                                                                                                                                                                                                                                                           | NR                                 |
| Morland, 2014      | PTSD                          | Group therapy      | video teleconferencing | Treatment provided in real time over VTC. The therapist involvement was the same as in-person CBT.                                                                                                                                                                                                                                                                                                                                                                                                                                                                           | NR                                 |
| Mitchell, 2008     | Bulimia nervosa               | Individual therapy | Telemedicine           | TV-CBT was delivered using a telemedicine system linking a regional healthcare system facility using T1 lines. Subjects interacted with the therapist only through telemedicine. Units were placed so as to mimic the interpersonal distance and height equality used in FTF therapy.                                                                                                                                                                                                                                                                                        | NR                                 |
| Himelhoch, 2013    | Depression                    | Individual therapy | Telephone-based CBT    | Participants were given a study workbook and were given the name and telephone number of their therapist. The therapist contacted the participant to set up the first session, reviewed workbook material and provided feedback.                                                                                                                                                                                                                                                                                                                                             | No AEs occurred among participants |
| Mohr, 2012         | Depression                    | Individual therapy | Telephone-based CBT    | Treatment provided in real time over the telephone. The therapist involvement was the same as in-person CBT.                                                                                                                                                                                                                                                                                                                                                                                                                                                                 | No AEs occurred among participants |
| Sadeghijoola, 2022 | Vasomotor symptoms            | Individual therapy | Telephone-based CBT    | The phone counseling group received 6 weekly 30-40-minute counseling sessions based on cognitive-behavioral therapy. The therapist involvement was the same as in-person CBT.                                                                                                                                                                                                                                                                                                                                                                                                | NR                                 |
| McAndrew, 2018     | Chronic multi-symptom illness | Individual therapy | Telephone-based CBT    | Treatment provided in real time over the telephone. The therapist involvement was the same as in-person CBT.                                                                                                                                                                                                                                                                                                                                                                                                                                                                 | NR                                 |

|                 |                               |                                         |                          |                                                                                                                                                                                                                                                                                                                                                                                                                                                                                                                                                                                                                                                 |                                    |
|-----------------|-------------------------------|-----------------------------------------|--------------------------|-------------------------------------------------------------------------------------------------------------------------------------------------------------------------------------------------------------------------------------------------------------------------------------------------------------------------------------------------------------------------------------------------------------------------------------------------------------------------------------------------------------------------------------------------------------------------------------------------------------------------------------------------|------------------------------------|
| Egede, 2015     | Depression                    | Individual therapy                      | Telemedicine             | Eight sessions of behavioural activation for depression was delivered via telemedicine Treatment provided in real time over the telephone. The therapist involvement was the same as in-person CBT.                                                                                                                                                                                                                                                                                                                                                                                                                                             | No AEs occurred among participants |
| Choi, 2014      | Depression                    | Individual therapy                      | Telephone-based CBT      | Treatment provided in real time over the telephone. The therapist involvement was the same as in-person CBT.                                                                                                                                                                                                                                                                                                                                                                                                                                                                                                                                    | NR                                 |
| Luxton, 2016    | Depression                    | Individual therapy                      | Telephone-based CBT      | Treatment provided in real time over video teleconferencing. The therapist involvement was the same as in-person CBT.                                                                                                                                                                                                                                                                                                                                                                                                                                                                                                                           | NR                                 |
| Glueckauf, 2012 | Depression                    | Both Individual therapy & Group therapy | Telephone-based CBT      | Treatment provided in real time over the telephone. The therapist involvement was the same as in-person CBT.                                                                                                                                                                                                                                                                                                                                                                                                                                                                                                                                    | NR                                 |
| Kheirkhah, 2023 | Depression                    | Individual therapy                      | iCBT                     | The therapist-guided iCBT was delivered by a psychologist in 25 min weekly sessions via telephone/Whatsapp. Before each session the therapist reviewed homework assignments.                                                                                                                                                                                                                                                                                                                                                                                                                                                                    | NR                                 |
| Watts, 2020     | Generalized anxiety disorder  | Individual therapy                      | videoconference          | Treatment provided in real time over video teleconferencing. The therapist involvement was the same as in-person CBT.                                                                                                                                                                                                                                                                                                                                                                                                                                                                                                                           | No AEs occurred among participants |
| Hall, 2017      | Chronic Fatigue Syndrome      | Individual therapy                      | Telephone-based CBT      | Treatment provided in real time over the telephone. The therapist involvement was the same as in-person CBT.                                                                                                                                                                                                                                                                                                                                                                                                                                                                                                                                    | NR                                 |
| Lovell, 2006    | Obsessive compulsive disorder | Individual therapy                      | Telephone-based CBT      | Treatment provided in real time over the telephone. The therapist involvement was the same as in-person CBT.                                                                                                                                                                                                                                                                                                                                                                                                                                                                                                                                    | NR                                 |
| Burgess, 2012   | Chronic fatigue syndrome      | Individual therapy                      | Telephone-based CBT      | Telephone CBT consisted of one face to face session of up to 3 hours with their assigned therapist. The long session allowed adequate time for a detailed assessment and socialization to the model. In addition, participants were given a folder containing a treatment manual, activity, sleep and thought diaries to complete, and stamped addressed envelopes in which to return them. Thereafter, participants were offered 13 fortnightly phone appointments of half an hour's duration. Participants returned completed homework diaries by post, fax or e-mail for the therapist to look at before and during their phone appointment. | NR                                 |
| Granberg, 2022  | Insomnia                      | NR                                      | video-based telemedicine | Treatment provided in real time over the telephone. The therapist involvement was the same as in-person CBT.                                                                                                                                                                                                                                                                                                                                                                                                                                                                                                                                    | NR                                 |

|               |                      |                    |                  |                                                                                                                                                                                                                                                                                                                                                                                                                                                                                                                                                                                                                                                                                                                         |                                                                                                                                                                                                                                                                                                                                                                                                                                                                                                                                                                                                                                                                                                                                                                                                                                                                                                                                                                |
|---------------|----------------------|--------------------|------------------|-------------------------------------------------------------------------------------------------------------------------------------------------------------------------------------------------------------------------------------------------------------------------------------------------------------------------------------------------------------------------------------------------------------------------------------------------------------------------------------------------------------------------------------------------------------------------------------------------------------------------------------------------------------------------------------------------------------------------|----------------------------------------------------------------------------------------------------------------------------------------------------------------------------------------------------------------------------------------------------------------------------------------------------------------------------------------------------------------------------------------------------------------------------------------------------------------------------------------------------------------------------------------------------------------------------------------------------------------------------------------------------------------------------------------------------------------------------------------------------------------------------------------------------------------------------------------------------------------------------------------------------------------------------------------------------------------|
| Bessell, 2012 | Appearance concern   | Individual therapy | Computerised CBT | A CBT therapist was assigned to each participant receiving computer-delivered CBT, and assisted them with any technical difficulties, and clarified any issues raised in the program that were not clear. The actual time spent by the psychologist responding to the participants was not recorded.                                                                                                                                                                                                                                                                                                                                                                                                                    | NR                                                                                                                                                                                                                                                                                                                                                                                                                                                                                                                                                                                                                                                                                                                                                                                                                                                                                                                                                             |
| Blom, 2015    | Insomnia             | Group therapy      | iCBT             | The iCBT included active support by trained therapists. Each module ended with the participant sending in a homework report via a secure messaging system. The therapist received the message, and within 24 h on weekdays they reviewed the homework assignments, gave written feedback and then gave the participant access to the next module. The participants could send questions to their therapist, which were answered within 24 h on weekdays. If the participant was inactive for 7 days, the therapist would send a mobile phone text message encouraging the participant to get in touch and continue treatment. If there was no response, the therapist would try to reach the patient by telephone.      | The post-assessment question about negative consequences of the treatment was answered affirmatively by 9 participants (19%), 3 in GCBT and 6 in iCBT (non-significant difference, Fischer exact statistic test value = 0.5, P = 0.46). These participants had a 3-11 point decrease in ISI from pre-to post-treatment. Three of the complaints (2 in GCBT and 1 in iCBT) were expected effects of interventions, temporary and considered acceptable by the patients (having to stop driving temporarily; being very sleepy during the beginning of sleep restriction; not being allowed to read in bed). One participant (iCBT) had high hopes for the treatment and was disappointed, one found the treatment stressful and two became more fixated on sleep and had increased worry about sleep, one had increased headache and a minor traffic incident after getting little sleep. One person in GCBT was worried about relapsing into burnout syndrome. |
| Milgrom, 2021 | Postnatal depression | Individual therapy | iCBT             | Support from a telephone coach was intended to encourage women to use and complete the program (Mum Mood Booster). Weekly low-intensity telephone coaching support (30 minutes maximum per week) was provided. Rather than providing therapy per se, coaches were instructed to reinforce participant progress, encourage program use (practice of strategies and completion of tasks), and introduce the themes of upcoming sessions. In an initial welcome call, the assigned MMB coach explained the MMB core structure, additional library articles, and partner website.<br><br>Coaches were able to access a secure administrative website to review each participant's program use to help tailor their support. | Symptom severity and safety of participants were monitored [and] A written risk management protocol, based on the successful approach of Simon et al, was initiated if any risk of harm to self or infant or marked deterioration of depressive symptoms was indicated; however, no adverse events were reported.                                                                                                                                                                                                                                                                                                                                                                                                                                                                                                                                                                                                                                              |

|                |                                   |                    |                     |                                                                                                                                                                                                                                                                                                                                                                                                                                                                                                                                                                                                                                                       |                                                                                                                                                                                                                                                                                                                                                                                                                                                                  |
|----------------|-----------------------------------|--------------------|---------------------|-------------------------------------------------------------------------------------------------------------------------------------------------------------------------------------------------------------------------------------------------------------------------------------------------------------------------------------------------------------------------------------------------------------------------------------------------------------------------------------------------------------------------------------------------------------------------------------------------------------------------------------------------------|------------------------------------------------------------------------------------------------------------------------------------------------------------------------------------------------------------------------------------------------------------------------------------------------------------------------------------------------------------------------------------------------------------------------------------------------------------------|
|                |                                   |                    |                     | Coaching call fidelity was facilitated by the use of a manualized script and a session-by-session checklist. Coaching calls were provided over a period of 9 weeks, which enabled participants to work through the 6 sessions at <1 session per week and allowed for the rescheduling of up to 3 missed coach calls.                                                                                                                                                                                                                                                                                                                                  |                                                                                                                                                                                                                                                                                                                                                                                                                                                                  |
| Meng, 2019     | Depression                        | NR                 | Telephone-based CBT | Treatment provided in real time over the telephone. The therapist involvement was the same as in-person CBT.                                                                                                                                                                                                                                                                                                                                                                                                                                                                                                                                          | NR                                                                                                                                                                                                                                                                                                                                                                                                                                                               |
| Ying, 2022     | Depression                        | Group therapy      | iCBT                | The <i>Healthy Psychological Station</i> comprised a 5-week-long clinician-guided iCBT delivered through a WeChat mini program. Participants were instructed to read the lessons in an individual format within 5 weeks, according to the same treatment timetable. The case stories were based on real cases of Chinese patients who had undergone CBT and recovered from subthreshold depression or major depressive disorder. Clinicians who were blind to the hypothesis provided technical assistance and encouraged participants to use the program. The actual time spent by the psychologist responding to the participants was not recorded. | NR                                                                                                                                                                                                                                                                                                                                                                                                                                                               |
| Kaldo, 2008    | Distress associated with tinnitus | Group therapy      | iCBT                | The Internet treatment was delivered via a website and e-mail contact between the participants and their therapist. All the information the participants submitted on the website was available to the therapist, who responded via e-mail with feedback, support, and recommendations on how to proceed. More intensive continuous e-mail interaction between the therapist and participant occurred, when needed, to foster adherence or to help out with problems. The actual time spent by the psychologist responding to the participants was not recorded.                                                                                      | NR                                                                                                                                                                                                                                                                                                                                                                                                                                                               |
| Peterson, 2022 | PTSD                              | Individual therapy | Telephone-based CBT | Telehealth cognitive processing therapy was conducted through a computer-based video link connection from the therapist's office to the participant's home. The therapist involvement was the same as in-person CPT.                                                                                                                                                                                                                                                                                                                                                                                                                                  | Adverse events (AEs) were assessed by the therapist once per week during the intervention period. During the treatment phase, 53% (63/120) of participants reported a total of 133 AEs. Most AEs were general medical or health conditions that were judged to be "unrelated" to the study procedures; however, 28% (33/120) of participants reported a total of 51 AEs that were at least "possibly" related. The most common related AEs reported by more than |

|                 |                               |                    |      |                                                                                                                                                                                                                                                                                                                                                                                                                                                                                                                                                                                                                                                                                                                                                                                                                                                                                                                                                                                                                                                                                                                                                                                                                                                                                                                                                                                                                                                                                                                                                                         |                                                                                                                                                                                                                                                                                                                                                                                                                                                                                                                                                                   |
|-----------------|-------------------------------|--------------------|------|-------------------------------------------------------------------------------------------------------------------------------------------------------------------------------------------------------------------------------------------------------------------------------------------------------------------------------------------------------------------------------------------------------------------------------------------------------------------------------------------------------------------------------------------------------------------------------------------------------------------------------------------------------------------------------------------------------------------------------------------------------------------------------------------------------------------------------------------------------------------------------------------------------------------------------------------------------------------------------------------------------------------------------------------------------------------------------------------------------------------------------------------------------------------------------------------------------------------------------------------------------------------------------------------------------------------------------------------------------------------------------------------------------------------------------------------------------------------------------------------------------------------------------------------------------------------------|-------------------------------------------------------------------------------------------------------------------------------------------------------------------------------------------------------------------------------------------------------------------------------------------------------------------------------------------------------------------------------------------------------------------------------------------------------------------------------------------------------------------------------------------------------------------|
|                 |                               |                    |      |                                                                                                                                                                                                                                                                                                                                                                                                                                                                                                                                                                                                                                                                                                                                                                                                                                                                                                                                                                                                                                                                                                                                                                                                                                                                                                                                                                                                                                                                                                                                                                         | 3 participants were nightmares (7.5%), sleep difficulty (5.8%), depression (5.0%), anxiety (4.2%), and irritability (4.2%). None of these AEs differed significantly by group after adjustment for the numbers of participants in each group.                                                                                                                                                                                                                                                                                                                     |
| Lundstrom, 2022 | Obsessive-compulsive disorder | Individual therapy | iCBT | <p>Participants received OCD-NET, a previously evaluated iCBT program for 14 weeks. The program included 10 modules, unlocked consecutively by the therapist upon completion of the homework assignment of the previous module. Therapists supported the participants through the 14 weeks via asynchronous messages, encouraging them to engage in ERP exercises and troubleshooting during treatment.</p> <p>Participants were free to log in to the platform at any time during the treatment period of 14 weeks but were informed that they could expect a reply from a therapist within 24 hours on weekdays. Therapists communicated with the participants in the platform through an email-like message system and answered messages during office hours between 8:00-17:00. If a participant was inactive for more than 2-3 days, therapists sent a message to the participant in the platform. If no reply was given, an SMS was sent to encourage the participant to log in to the platform or ask for help. The therapist could also contact the participant via telephone if no response was given to prior contact attempts.</p> <p>To increase participant engagement in follow-up assessments, participants were reminded via text message 48 hours prior to an appointment. If a participant did not attend a follow-up session, a psychiatrist contacted the participant via telephone and performed the assessments. The participants were also reminded about the self-rated outcome measures via text messages sent from the internet platform.</p> | The most frequently reported adverse event during treatment was anxiety (30 participants [25%]), followed by depressive symptoms (20 participants [17%]), stress (11 participants [9%]), and sleep disturbances (9 participants [8%]) (eAppendix 13, eTable 18, and eTable 19 in Supplement 2). Two serious adverse events related to increased suicidal ideation (1 in the face-to-face treatment and 1 in the guided iCBT treatment condition) were recorded. Both participants were briefly admitted to the hospital as in-patients but remained in the trial. |
| Carlbring, 2005 | Panic disorder                | Individual therapy | iCBT | In the IT group, feedback on the homework was usually given within 36 h after sending their answers via e-mail. On the basis of these e-mails, a subjective assessment was made by the therapist of whether the participant was ready to continue; if so, the password to the next module was sent. If not, the participant received instructions on what needed to be completed before proceeding to the next module. All contact was exclusively via e-                                                                                                                                                                                                                                                                                                                                                                                                                                                                                                                                                                                                                                                                                                                                                                                                                                                                                                                                                                                                                                                                                                               | NR                                                                                                                                                                                                                                                                                                                                                                                                                                                                                                                                                                |



|                 |                                            |               |                  |                                                                                                                                                                                                                                                                                                                                                                                                                                                                                                                                                                                                                                                                                                                                                                                                                    |    |
|-----------------|--------------------------------------------|---------------|------------------|--------------------------------------------------------------------------------------------------------------------------------------------------------------------------------------------------------------------------------------------------------------------------------------------------------------------------------------------------------------------------------------------------------------------------------------------------------------------------------------------------------------------------------------------------------------------------------------------------------------------------------------------------------------------------------------------------------------------------------------------------------------------------------------------------------------------|----|
|                 |                                            |               |                  | mail. The participants were encouraged to come up with questions or reflections during treatment, and they were free to send an unlimited number of emails. The total number of reciprocal contacts (receive and send) ranged from 4 to 31 (M = 15.4; SD = 5.5). As the e-mail responses to the participants often were very similar much text could be recycled. The mean total time spent on each participant was approximately 150 min, including administration, and responding to the e-mails.                                                                                                                                                                                                                                                                                                                |    |
| Conrad, 2015    | Chronic tinnitus                           | Group therapy | iCBT             | At the end of each treatment week, participants contacted the therapist via email to inform them of their progress with the modules and if they had encountered any problems. The therapist provided feedback, support, and recommendations on how to proceed. The actual time spent by the psychologist responding to the participants was not recorded.                                                                                                                                                                                                                                                                                                                                                                                                                                                          | NR |
| de Boer, 2014   | Non-specific chronic pain                  | Group therapy | iCBT             | Each module was followed by homework assignments. These assignments were filled in on the computer and submitted by e-mail to the course facilitator (a psychologist at a Pain Center). Participants receive personal feedback from their psychologist.<br><br>The amount of contact and the content of the e-mail messages from the psychologist in response to the submitted homework assignments were to a large extent standardized. For all participants, the e-mail messages had the same structure. After modules 2, 4, 7 and 8, additional e-mail contact took place, focused upon discussing the progress in the course, experienced difficulties and any questions the participant had concerning the course. The actual time spent by the psychologist responding to the participants was not recorded. | NR |
| Gollings, 2006  | Body dissatisfaction and disordered eating | Group therapy | iCBT             | Treatment provided in real time over the Internet. The therapist involvement was the same as in-person CBT.                                                                                                                                                                                                                                                                                                                                                                                                                                                                                                                                                                                                                                                                                                        | NR |
| Hedman, 2011    | Social anxiety disorder                    | Group therapy | iCBT             | The role of the therapist was mainly to provide feedback regarding homework and to grant access to the treatment modules. However, the patient could contact the therapist at any time and expect a reply within 24 hours during weekdays. The general instruction to internet therapists was to restrict time spent on each patient to less than 10 minutes per week.                                                                                                                                                                                                                                                                                                                                                                                                                                             | NR |
| Jarnefelt, 2020 | Insomnia                                   | Group therapy | computerized CBT | CBT-I participants had one individual session with a nurse before the treatment, during which the nurse gave them instructions on                                                                                                                                                                                                                                                                                                                                                                                                                                                                                                                                                                                                                                                                                  | NR |

|                  |                                  |                    |                  |                                                                                                                                                                                                                                                                                                                                                                                                                                                                                                                                                                                                                                                                                                                                                                                                                                                                                                                               |                                     |
|------------------|----------------------------------|--------------------|------------------|-------------------------------------------------------------------------------------------------------------------------------------------------------------------------------------------------------------------------------------------------------------------------------------------------------------------------------------------------------------------------------------------------------------------------------------------------------------------------------------------------------------------------------------------------------------------------------------------------------------------------------------------------------------------------------------------------------------------------------------------------------------------------------------------------------------------------------------------------------------------------------------------------------------------------------|-------------------------------------|
|                  |                                  |                    |                  | how to use the self-help material. The session after the self-help program was used to review each participant's feedback and experiences (both lasting 30 min).                                                                                                                                                                                                                                                                                                                                                                                                                                                                                                                                                                                                                                                                                                                                                              |                                     |
| Jasper, 2014     | Chronic tinnitus                 | Group therapy      | iCBT             | Once a week, patients could communicate with their therapist via a secure online messaging system. The therapists were instructed to try to dedicate a maximum of 10 min per week per patient to e-mail communication.                                                                                                                                                                                                                                                                                                                                                                                                                                                                                                                                                                                                                                                                                                        | NR                                  |
| Johansson, 2021  | Alcohol use disorder             | Individual therapy | iCBT             | The internet-based treatment modules were released one-by-one by the therapist and all the communication between the therapist and the patient was conducted on-line asynchronously without any visits at the clinic during the treatment. Automated e-mails were sent to the patient at the release of every new module and with every new message from the therapist. The actual time spent by the psychologist responding to the participants was not recorded                                                                                                                                                                                                                                                                                                                                                                                                                                                             | No AEs occurred among participants. |
| Kiropoulos, 2008 | Panic disorder                   | Individual therapy | iCBT             | Nine registered and one probationary psychologist (overall seven female and two male), all trained in CBT for PD, made contact via email with the PO treatment participants assigned to them and guided each participant through the internet-based program.<br><br>All psychologists interacted with their participant via email, which allowed the psychologist to provide individualized support and feedback to the participant, according to the participants' individual needs. Therapists responded to participants' emails within 24 h of receiving them. Therapists maintained a log of the time they spent on treatment for each PO participant including time spent reading emails, constructing return emails, and listing any deviation from treatment protocol such as having telephone contact with the participant. The actual time spent by the psychologist responding to the participants was not recorded | NR                                  |
| Ye, 2016         | Insomnia                         | Individual therapy | iCBT             | Therapists provided support for internet-based CBT, but details on time spent were not reported.                                                                                                                                                                                                                                                                                                                                                                                                                                                                                                                                                                                                                                                                                                                                                                                                                              | NR                                  |
| Leterme, 2020    | Adjustment disorder with anxiety | Individual therapy | computerized CBT | The subjects benefited from a short intervention of 10 min on average with a nurse before and after each remote session (5 min before the e-learning session and 5 min after the e-learning session). The aim of this face-to-face contact was to provide adherence-focused guidance (by strengthening the social presence) and technical-focused guidance. The nurse investigated adverse events and drug dose changes since the last session,                                                                                                                                                                                                                                                                                                                                                                                                                                                                               | NR                                  |

|                 |                                  |                    |                   |                                                                                                                                                                                                                                                                                                                                                                                                                                                                                                                                                                                                                                                                                                                                                     |                                                                                                                                                                                                                                                                                                                                                                                                                                                                                                          |
|-----------------|----------------------------------|--------------------|-------------------|-----------------------------------------------------------------------------------------------------------------------------------------------------------------------------------------------------------------------------------------------------------------------------------------------------------------------------------------------------------------------------------------------------------------------------------------------------------------------------------------------------------------------------------------------------------------------------------------------------------------------------------------------------------------------------------------------------------------------------------------------------|----------------------------------------------------------------------------------------------------------------------------------------------------------------------------------------------------------------------------------------------------------------------------------------------------------------------------------------------------------------------------------------------------------------------------------------------------------------------------------------------------------|
|                 |                                  |                    |                   | answered any questions, discussed the progress of the session, and guided participants in the navigation of the computer program if needed.                                                                                                                                                                                                                                                                                                                                                                                                                                                                                                                                                                                                         |                                                                                                                                                                                                                                                                                                                                                                                                                                                                                                          |
| Lancee, 2016    | Insomnia                         | Individual therapy | iCBT              | After reading the sleep hygiene section, participants wrote down their intentions for the following week; this was sent to their therapist for his/her feedback. The coach assessed this sleep window and gave feedback based on the form and the sleep diary. For the remainder of the program the coach and participants discussed sleep windows every week (up to 8 w). However, the actual time spent by the psychologist responding to the participants was not recorded.                                                                                                                                                                                                                                                                      | No AEs occurred among participants.                                                                                                                                                                                                                                                                                                                                                                                                                                                                      |
| Stubbings, 2013 | Mood and anxiety disorders       | Individual therapy | Videoconferencing | Treatment provided in real time over videoconference. The therapist involvement was the same as in-person CBT                                                                                                                                                                                                                                                                                                                                                                                                                                                                                                                                                                                                                                       | NR                                                                                                                                                                                                                                                                                                                                                                                                                                                                                                       |
| Thase, 2018     | Depression                       | Individual therapy | Computerized CBT  | A clinician dashboard allowed therapists to assess progress, view learning exercises, and facilitate coordination of treatment. The initial session with the therapist lasted 50 minutes and provided both an overview of CBT and an introduction to using Good Days Ahead [GDA] program. Therapists reviewed the material covered in the module and self-help assignments as a springboard to apply CBT methods to specific problem areas identified by the patient. During the second 8 weeks, patients received four 25 minute “booster” sessions with their therapist and could use the CCBT modules ad lib to facilitate mastery of material. Thus, across 16 weeks, a patient could receive up to 325 minutes total contact with a therapist. | There were two serious adverse events in the CBT arm that led to premature study termination (hospitalization after a panic attack and death following an emergency hospitalization for open heart surgery). There were also two serious adverse events among patients allocated to the CCBT arm that did not result in study termination (one patient was victim of domestic violence and another took an overdose of a small number of acetaminophen tablets during the follow-up phase of the study). |
| Wagner, 2014    | Depression                       | Individual therapy | iCBT              | The online intervention was given as a guided intervention with intensive therapist contact. The therapist time involved responding to texts from patients, requiring 20–50 min per patient. Therapists provided individual written feedback within one working day, along with instructions for the next writing assignment.                                                                                                                                                                                                                                                                                                                                                                                                                       | NR                                                                                                                                                                                                                                                                                                                                                                                                                                                                                                       |
| Paxton, 2007    | Boding image and eating disorder | Group therapy      | iCBT              | Participants and the therapist logged on weekly to a secure, password protected chat-room. Sessions were led by the therapist and participants typed responses to each other in real-time. As such, therapist involvement was the same as in-person CBT.                                                                                                                                                                                                                                                                                                                                                                                                                                                                                            | No AEs occurred among participants.                                                                                                                                                                                                                                                                                                                                                                                                                                                                      |
| Vallejo, 2015   | Fibromyalgia                     | Group therapy      | iCBT              | Participants in the iCBT group could send individual messages to their therapist. These messages were responded to individually. The program had several points to facilitate interaction with the                                                                                                                                                                                                                                                                                                                                                                                                                                                                                                                                                  | NR                                                                                                                                                                                                                                                                                                                                                                                                                                                                                                       |

|               |                                  |                    |                  |                                                                                                                                                                                                                                                                                                                                                                                                                                                                                                                                                                                                                        |    |
|---------------|----------------------------------|--------------------|------------------|------------------------------------------------------------------------------------------------------------------------------------------------------------------------------------------------------------------------------------------------------------------------------------------------------------------------------------------------------------------------------------------------------------------------------------------------------------------------------------------------------------------------------------------------------------------------------------------------------------------------|----|
|               |                                  |                    |                  | therapist: (a) questions at the end of each session in which the participants were asked to verify if they understood the main topics of the session and feedback to help them follow the program; (b) tracking of the following of the program to facilitate information for feedback; (c) feedback message to the participant to reinforce the weekly schedule; (d) automatic information to the therapist when a participant stopped content for more than 3 days to consider proactive contact to resolve any problems. The actual time spent by the psychologist responding to the participants was not recorded. |    |
| Zerwas, 2017  | Bulimia nervosa                  | Group therapy      | iCBT             | Treatment provided in real time over an online chat group. The therapist involvement was the same as in-person CBT                                                                                                                                                                                                                                                                                                                                                                                                                                                                                                     | NR |
| Kenardy, 2003 | Panic disorder                   | Individual therapy | Computerised CBT | Therapists provided support for computer-based CBT modules, but details on time spent were not reported.                                                                                                                                                                                                                                                                                                                                                                                                                                                                                                               | NR |
| Azimi, 2019   | Insomnia and comorbid depression | Individual therapy | iCBT             | Remote CBT was delivered via email and an application, and supported by therapists, but details on time spent were not reported.                                                                                                                                                                                                                                                                                                                                                                                                                                                                                       | NR |

AE= adverse event; CBT= cognitive behavior therapy; CCBT: computerised cognitive behavior therapy; CPT= cognitive process therapy; CBT-I=cognitive behavioural therapy interventions for Insomnia; iCBT= internet-based cognitive behavior therapy; IVR-CBT: Interactive Voice Response CBT; FTF= face-to-face; NR= not reported; SD= standard deviation; VTC= video teleconference; OCD= obsessive compulsive disorder; PD= panic disorder; PO= Panic Online

**eTable 2: Compliance rates with therapist-guided remote and in-person CBT within trials**

| Study                                                                        | No. of CBT sessions              | Compliance with remote CBT, no. (%) | Compliance with in-person CBT, no. (%) |
|------------------------------------------------------------------------------|----------------------------------|-------------------------------------|----------------------------------------|
| <b>High threshold for compliance (100% of modules completed)</b>             |                                  |                                     |                                        |
| Milgrom <sup>a b</sup><br>2021                                               | 10 for remote<br>6 for in-person | 28/39 (72%)                         | 18/39 (46%)                            |
| Lancee <sup>a</sup><br>2016                                                  | 6                                | 15/30 (50%)                         | 21/30 (70%)                            |
| Ying<br>2022                                                                 | 5                                | 83/102 (81%)                        | 55/85 (65%)                            |
| Kaldo<br>2008                                                                | 7                                | 16/26 (62%)                         | 19/25 (76%)                            |
| Hedman<br>2011                                                               | 15                               | 51/64 (80%)                         | 50/62 (81%)                            |
| Vallejo<br>2015                                                              | 10                               | 20/20 (100%)                        | 20/20 (100%)                           |
| de Boer<br>2014                                                              | 8                                | 22/38 (58%)                         | 28/ 34 (82 %)                          |
| Andrews<br>2011                                                              | 6                                | 14/23 (61%)                         | 14/14 (100%)                           |
| Carlbring <sup>b</sup><br>2005                                               | 7 for remote<br>9 for in-person  | 7/25 (28%)                          | 21/24 (88%)                            |
| Maieritsch<br>2016                                                           | 10                               | 25/45 (56%)                         | 26/45 (58%)                            |
| Morland<br>2014                                                              | 12                               | 46/61 (75%)                         | 50/64 (78%)                            |
| Sadeghijoola<br>2022                                                         | 6                                | 18/20 (90%)                         | 18/20 (90%)                            |
| Egede<br>2015                                                                | 8                                | 97/120 (81%)                        | 95/121 (79%)                           |
| Choi<br>2014                                                                 | 12                               | 49/56 (88%)                         | 52/63 (82%)                            |
| Glueckauf<br>2012                                                            | 12                               | 6/7 (86%)                           | 5/7 (71%)                              |
| Luxton<br>2016                                                               | 8                                | 40/62 (65%)                         | 42/59 (71%)                            |
| Watts<br>2020                                                                | 15                               | 52/69 (75%)                         | 65/79 (82%)                            |
| Kalapatapu<br>2014                                                           | 18                               | 37/50 (74%)                         | 40/53 (76%)                            |
| Kheirkhah<br>2023                                                            | 8                                | 26/30 (87%)                         | 22/30 (73%)                            |
| Meng<br>2019                                                                 | 12                               | 56/56 (100%)                        | 53/53 (100%)                           |
| Granberg<br>2022                                                             | 6                                | 16/21 (76%)                         | 15/20 (75%)                            |
| <b>Moderate threshold for compliance * (50% to 80% of modules completed)</b> |                                  |                                     |                                        |
| Jasper <sup>a</sup><br>2014                                                  | 18                               | 35/41 (85%)                         | 26/43 (60%)                            |
| Jarnefelt <sup>a b</sup><br>2020                                             | 10 for remote<br>6 for in-person | NR/24                               | 9/24 (38%)                             |

|                                                                 |                                   |               |               |
|-----------------------------------------------------------------|-----------------------------------|---------------|---------------|
| Peterson<br>2022                                                | 12                                | 29/44 (66%)   | 56/76 (74%)   |
| Blom<br>2015                                                    | 8                                 | 16/24 (67%)   | 20/24 (83%)   |
| Kiropoulos<br>2008                                              | 12                                | 41/46 (89%)   | 38/40 (95%)   |
| Gollings<br>2006                                                | 8                                 | 18/21 (86%)   | 15/19 (79%)   |
| Lancee <sup>a</sup><br>2016                                     | 6                                 | 22/30 (73%)   | 28/30 (93%)   |
| Paxton<br>2007                                                  | 8                                 | 24/37 (65%)   | 32/42 (76%)   |
| Bergström<br>2010                                               | 10                                | 40/53 (75%)   | 56/60 (93%)   |
| Anderson <sup>b</sup><br>2013                                   | 7 for remote<br>8 for in-person   | 29/33 (88%)   | 26/36 (72%)   |
| Stubbings<br>2013                                               | 12                                | 12/14 (86%)   | 11/12 (79%)   |
| Wagner<br>2014                                                  | 7                                 | 25/32 (78%)   | 28/30 (93%)   |
| Thase<br>2018                                                   | 21                                | 62/77 (81%)   | 60/77 (78%)   |
| Axelsson<br>2020                                                | 12                                | 81/102 (79%)  | 92/102 (90%)  |
| Lundstrom <sup>b</sup><br>2022                                  | 10 for remote<br>16 for in-person | 40/42 (95%)   | 31/38 (82%)   |
| Alegria <sup>a</sup><br>2014                                    | 6 to 8                            | 60/87 (69%)   | 53/84 (63%)   |
| Liu<br>2020                                                     | 12                                | 78/103 (76%)  | 68/104 (65%)  |
| Michell<br>2008                                                 | 20                                | 37/62 (60%)   | 40/66 (61%)   |
| Himelhoch<br>2013                                               | 11                                | 3/16 (19%)    | 10/18 (56%)   |
| McAndrew<br>2018                                                | 10                                | 25/43 (57%)   | 24/42(56%)    |
| <b>Low threshold for compliance (≤30% of modules completed)</b> |                                   |               |               |
| Jarnefelt <sup>a b</sup><br>2020                                | 10 for remote<br>6 for in-person  | 19/24 (79%)   | 20/24 (83%)   |
| Heapy<br>2017                                                   | 10                                | 56/62 (90%)   | 46/63 (73%)   |
| Zerwas<br>2017                                                  | 16                                | 87/98 (89%)   | 78/98 (80%)   |
| Leterme<br>2020                                                 | 5                                 | 40/40 (100%)  | 38/39 (95%)   |
| Alegria <sup>a</sup><br>2014                                    | 6 to 8                            | 18/87 (21%)   | 13/84 (16%)   |
| <b>Threshold not defined and/or not report compliance rate</b>  |                                   |               |               |
| Kenardy<br>2003                                                 | 6                                 | NR/50         | NR/45         |
| Johansson<br>2021                                               | 5                                 | 143/150 (95%) | 139/151 (92%) |

|                             |                                   |               |               |
|-----------------------------|-----------------------------------|---------------|---------------|
| Conrad <sup>b</sup><br>2015 | 18 for remote<br>10 for in-person | NR/41         | NR/43         |
| Ye<br>2016                  | 8                                 | NR/27         | NR/26         |
| Azimi<br>2019               | 6                                 | NR/15         | NR/15         |
| Bessell<br>2012             | 8                                 | NR/25         | NR/27         |
| Franklin<br>2018            | 8                                 | 9/11 (82%)    | 7/7 (100%)    |
| Frueh<br>2007               | 14                                | 9/17 (53%)    | 12/21 (57%)   |
| Mohr<br>2012                | 18                                | 129/163 (79%) | 109/162 (62%) |
| Hall<br>2017                | 18                                | NR            | NR            |

**a** Trial with different compliance thresholds

**b** Trials in which the number of sessions were different between remote and in-person groups

NR: Not reported

NA: Not applicable

\*Dropout or discontinuation was considered as moderate threshold

**eTable 3:** Subgroup analysis using univariable meta-regression with Knapp and Hartung modification to the variance of the estimated effect (SMD)

| Subgroup                                                    |                                    | # trials | Coefficient (95% CI)    | P value for test of interaction* |
|-------------------------------------------------------------|------------------------------------|----------|-------------------------|----------------------------------|
| Clinical condition/diagnosis                                | Depression                         | 13       | Reference               |                                  |
|                                                             | Anxiety and related disorders      | 16       | 0.06 (-0.19,0.31)       | 0.61                             |
|                                                             | Chronic pain and fatigue syndromes | 6        | -0.08 (-0.42,0.27)      | 0.66                             |
|                                                             | Body image/eating disorder         | 4        | -0.25 (-0.66,0.15)      | 0.21                             |
|                                                             | Insomnia                           | 6        | -0.25 (-0.64,0.13)      | 0.19                             |
|                                                             | Tinnitus                           | 3        | -0.13 (-0.57,0.31)      | 0.55                             |
| Overall risk of bias                                        | Low risk of bias                   | 8        | Reference               |                                  |
|                                                             | Some concern                       | 24       | -0.01 (-0.29,0.27)      | 0.94                             |
|                                                             | High risk of bias                  | 18       | -0.11 (-0.41,0.18)      | 0.46                             |
| RoB Domain 1: bias arising from the randomization process   | Low risk of bias                   | 38       | Reference               |                                  |
|                                                             | Some concern                       | 8        | -0.07 (-0.34, 0.20)     | 0.61                             |
|                                                             | High risk of bias                  | 4        | -0.33 (-0.70, 0.05)     | 0.08                             |
| RoB Domain 2: bias for deviation from intended intervention | Low risk of bias                   | 50       | N/A                     | N/A                              |
|                                                             | Some concern                       | 0        |                         |                                  |
|                                                             | High risk of bias                  | 0        |                         |                                  |
| RoB Domain 3: missing outcome data                          | Low risk of bias                   | 34       | Reference               |                                  |
|                                                             | Some concern                       | 7        | 0.20 (-0.10, 0.49)      | 0.19                             |
|                                                             | High risk of bias                  | 9        | -0.15 (-0.40, 0.10)     | 0.24                             |
| RoB Domain 4: bias in measurement of the outcome            | Low risk of bias                   | 16       | Reference               |                                  |
|                                                             | Some concern                       | 25       | 0.01 (-0.21, 0.22)      | 0.96                             |
|                                                             | High risk of bias                  | 9        | 0.06 (-0.23, 0.36)      | 0.67                             |
| RoB Domain 5: bias in the selection of the reported results | Low risk of bias                   | 32       | Reference               |                                  |
|                                                             | Some concern                       | 13       | 0.10 (-0.14, 0.33)      | 0.40                             |
|                                                             | High risk of bias                  | 5        | -0.11 (-0.42, 0.20)     | 0.48                             |
| Delivery of CBT                                             | Individual therapy                 | 31       | Reference               |                                  |
|                                                             | Group therapy                      | 18       | 0.16 (-0.03,0.36)       | 0.10                             |
| Length of follow-up (for each day)                          |                                    | 50       | 0.0001 (-0.0004,0.0007) | 0.57                             |

\* Compared to reference category, except for length of follow-up

N/A: not applicable



**eFigure 1: Contour enhanced funnel plot of patient compliance rates (Moderate threshold)**

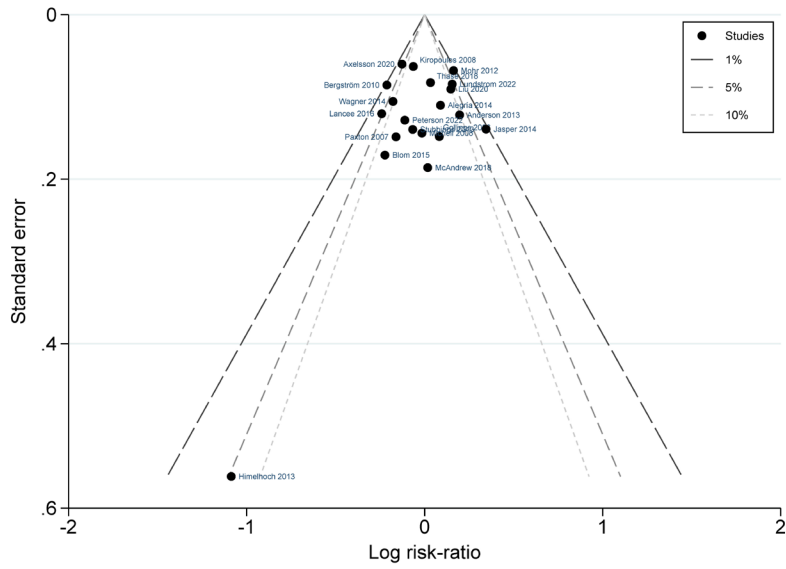

**P-value for Harbord's test: 0.597**

**eFigure 2: Contour enhanced funnel plot of patient compliance rates (High threshold)**

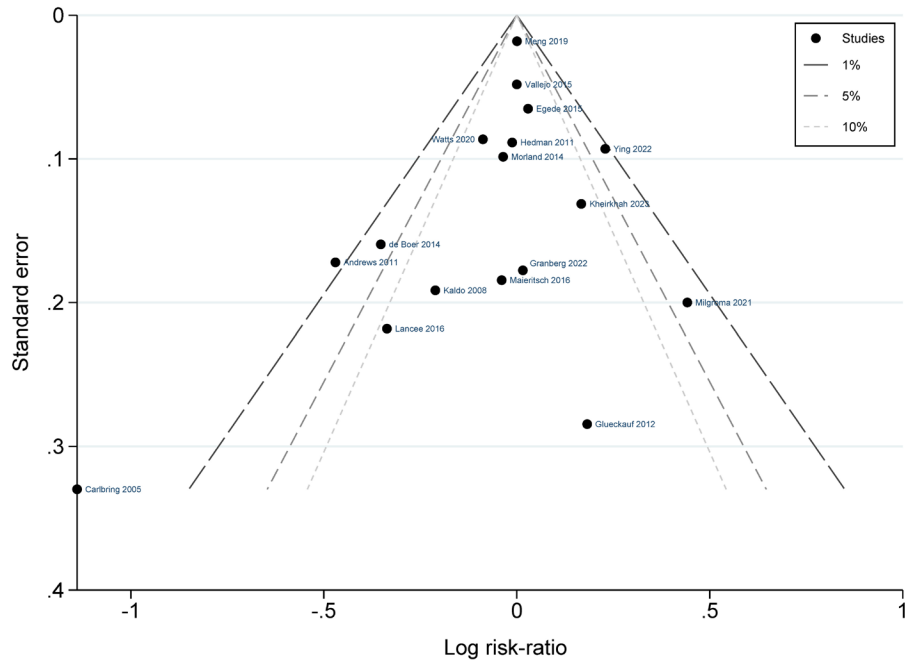

**P-value for Harbord's test: 0.139**

**eTable 4: Risk of Bias**

| Study              | Risk of bias domains |    |    |    |    | Overall |
|--------------------|----------------------|----|----|----|----|---------|
|                    | D1                   | D2 | D3 | D4 | D5 |         |
| Anderson, 2013     | +                    | +  | +  | X  | +  | X       |
| Heapy, 2017        | +                    | +  | +  | X  | +  | X       |
| Andrews, 2011      | +                    | +  | X  | X  | +  | X       |
| Axelsson, 2020     | +                    | +  | +  | X  | +  | X       |
| Bergstrom, 2010    | +                    | +  | +  | +  | +  | +       |
| Bessell, 2012      | +                    | +  | X  | X  | +  | X       |
| Blom, 2015         | +                    | +  | +  | -  | -  | -       |
| Milgrom, 2021      | +                    | +  | +  | -  | +  | -       |
| Ying, 2022         | +                    | +  | -  | -  | -  | -       |
| Kaldo, 2008        | +                    | +  | +  | -  | -  | -       |
| Peterson, 2022     | X                    | +  | X  | +  | +  | X       |
| Lundström, 2022    | +                    | +  | +  | +  | +  | +       |
| Carlbring, 2005    | +                    | +  | +  | -  | -  | -       |
| Conrad, 2015       | +                    | +  | +  | -  | +  | -       |
| de Boer, 2014      | +                    | +  | +  | -  | -  | -       |
| Gollings, 2006     | -                    | +  | +  | -  | -  | -       |
| Hedman, 2011       | +                    | +  | +  | +  | +  | +       |
| Järnefelt, 2020    | X                    | +  | X  | -  | +  | X       |
| Jasper, 2014       | +                    | +  | +  | -  | X  | X       |
| Johansson, 2021    | +                    | +  | +  | -  | -  | -       |
| Kiropoulos, 2008   | X                    | +  | +  | -  | X  | X       |
| Ye, 2016           | -                    | +  | +  | -  | -  | -       |
| Leterme, 2020      | +                    | +  | -  | -  | +  | -       |
| Lancee, 2016       | X                    | +  | X  | -  | +  | X       |
| Stubblings, 2013   | +                    | +  | X  | X  | +  | X       |
| Thase, 2018        | -                    | +  | +  | +  | +  | -       |
| Wagner, 2014       | -                    | +  | +  | -  | +  | -       |
| Paxon, 2007        | +                    | +  | +  | -  | -  | -       |
| Vallejo, 2015      | +                    | +  | +  | -  | -  | -       |
| Zerwas, 2017       | +                    | +  | +  | +  | +  | +       |
| Kenardy, 2003      | X                    | +  | X  | -  | -  | X       |
| Azimi, 2019        | -                    | +  | -  | -  | X  | X       |
| Alegria, 2014      | -                    | +  | +  | X  | X  | X       |
| Franklin, 2018     | +                    | +  | -  | X  | +  | X       |
| Frueh, 2007        | -                    | +  | +  | X  | -  | X       |
| Maieritsch, 2016   | +                    | +  | -  | +  | -  | -       |
| Liu, 2020          | +                    | +  | X  | +  | +  | X       |
| Morland, 2014      | +                    | +  | X  | +  | +  | X       |
| Mitchell, 2008     | +                    | +  | +  | +  | X  | -       |
| Himelhoch, 2013    | +                    | +  | +  | +  | +  | +       |
| Mohr, 2012         | +                    | +  | X  | +  | +  | X       |
| Sadeghijoola, 2022 | +                    | +  | +  | +  | +  | +       |
| McAndrew, 2018     | +                    | +  | +  | +  | +  | +       |
| Egede, 2015        | +                    | +  | +  | +  | +  | +       |
| Choi, 2014         | +                    | +  | +  | -  | +  | -       |
| Glueckauf, 2012    | +                    | +  | -  | +  | -  | -       |
| Luxton, 2015       | +                    | +  | +  | -  | +  | -       |
| Watts, 2020        | +                    | +  | +  | -  | -  | -       |
| Hall, 2017         | -                    | +  | +  | -  | +  | -       |
| Kalapatapu, 2014   | +                    | +  | -  | -  | +  | -       |
| Kherikhah, 2023    | +                    | +  | -  | -  | +  | -       |
| Meng, 2019         | -                    | +  | +  | -  | -  | -       |
| Granberg, 2022     | -                    | +  | -  | -  | +  | -       |
| Lovell, 2006       | +                    | +  | +  | -  | +  | -       |
| Burgess, 2012      | +                    | +  | +  | +  | +  | +       |

Domains:  
D1: Bias arising from the randomization process.  
D2: Bias due to deviations from intended intervention.  
D3: Bias due to missing outcome data.  
D4: Bias in measurement of the outcome.  
D5: Bias in selection of the reported result.

Judgement  
High (Red X)  
Some concerns (Yellow -)  
Low (Green +)

**eTable 5: Registered trial protocols among studies eligible for review (n=54)**

| Study            | Link to study protocol                                                                                                                                                  |
|------------------|-------------------------------------------------------------------------------------------------------------------------------------------------------------------------|
| Kenardy, 2003    | no publicly available protocol                                                                                                                                          |
| Carlbring, 2005  | no publicly available protocol                                                                                                                                          |
| Gollings, 2006   | no publicly available protocol                                                                                                                                          |
| Lovell, 2006     | Trial registration Current Controlled Trials<br>ISRCTN500103984.                                                                                                        |
| Frueh, 2007      | no publicly available protocol                                                                                                                                          |
| Paxton, 2007     | no publicly available protocol                                                                                                                                          |
| Kaldo, 2008      | no publicly available protocol                                                                                                                                          |
| Kiropoulos, 2008 | no publicly available protocol                                                                                                                                          |
| Mitchell, 2008   | no publicly available protocol                                                                                                                                          |
| Bergström, 2010  | <a href="https://www.clinicaltrials.gov/ct2/show/NCT00845260">https://www.clinicaltrials.gov/ct2/show/NCT00845260</a>                                                   |
| Andrews, 2011    | <a href="https://trialsearch.who.int/Trial2.aspx?TrialID=ACTRN12609000212257">https://trialsearch.who.int/Trial2.aspx?TrialID=ACTRN12609000212257</a>                   |
| Hedman, 2011     | <a href="https://clinicaltrials.gov/ct2/show/NCT00564967">https://clinicaltrials.gov/ct2/show/NCT00564967</a>                                                           |
| Bessell, 2012    | no publicly available protocol                                                                                                                                          |
| Burgess, 2012    | no publicly available protocol                                                                                                                                          |
| Glueckauf, 2012  | no publicly available protocol                                                                                                                                          |
| Mohr, 2012       | clinicaltrials.gov Identifier: NCT00498706                                                                                                                              |
| Anderson, 2013   | no publicly available protocol                                                                                                                                          |
| Himmelhoch, 2013 | Trial Registry: ClinicalTrial.gov identifier: NCT01055158.                                                                                                              |
| Stubbings, 2013  | <a href="https://www.australianclinicaltrials.gov.au/anzctr/trial/ACTRN12609000819224">https://www.australianclinicaltrials.gov.au/anzctr/trial/ACTRN12609000819224</a> |

|                  |                                                                                                                                                                                                           |
|------------------|-----------------------------------------------------------------------------------------------------------------------------------------------------------------------------------------------------------|
| Alegría, 2014    | no publicly available protocol                                                                                                                                                                            |
| Choi, 2014       | no publicly available protocol                                                                                                                                                                            |
| Jasper, 2014     | <a href="https://clinicaltrials.gov/ct2/show/NCT01205906">https://clinicaltrials.gov/ct2/show/NCT01205906</a>                                                                                             |
| Conrad, 2015     | <a href="https://clinicaltrials.gov/ct2/show/NCT01205906">https://clinicaltrials.gov/ct2/show/NCT01205906</a>                                                                                             |
| Morland, 2014    | clinicalgov identifier NCT00879255                                                                                                                                                                        |
| Wagner, 2014     | <a href="https://www.anzctr.org.au/Trial/Registration/TrialReview.aspx?ACTRN=12611000563965">https://www.anzctr.org.au/Trial/Registration/TrialReview.aspx?ACTRN=12611000563965</a>                       |
| de Boer, 2014    | no publicly available protocol                                                                                                                                                                            |
| Blom, 2015       | no publicly available protocol                                                                                                                                                                            |
| Egede, 2014      | This trial is registered with ClinicalTrials.gov, number: NCT00324701.                                                                                                                                    |
| Franklin, 2018   | This trial was registered at clinicaltrials.gov (NCT01176123) prior to data collection                                                                                                                    |
| Vallejo, 2015    | no publicly available protocol                                                                                                                                                                            |
| Lancee, 2016     | <a href="https://clinicaltrials.gov/ct2/show/NCT01955850">https://clinicaltrials.gov/ct2/show/NCT01955850</a>                                                                                             |
| Luxton, 2016     | Clinical Trials Registry (ClinicalTrials.gov Identifier NCT01599585; available online at <a href="https://clinicaltrials.gov/ct2/show/NCT01599585">https://clinicaltrials.gov/ct2/show/NCT01599585</a> ). |
| Maieritsch, 2016 | no publicly available protocol                                                                                                                                                                            |
| Ye, 2016         | no publicly available protocol                                                                                                                                                                            |
| Hall, 2017       | Trial Registration: NIH 5R01NS055672                                                                                                                                                                      |
| Heapy, 2017      | <a href="https://clinicaltrials.gov/ct2/show/NCT01025752">https://clinicaltrials.gov/ct2/show/NCT01025752</a>                                                                                             |
| McAndrew, 2018   | Clinical Trials #NCT00129454,                                                                                                                                                                             |
| Thase, 2018      | no publicly available protocol                                                                                                                                                                            |
| Azimi, 2019      | no publicly available protocol                                                                                                                                                                            |

|                       |                                                                                                                                                                                                                                                                                                     |
|-----------------------|-----------------------------------------------------------------------------------------------------------------------------------------------------------------------------------------------------------------------------------------------------------------------------------------------------|
| Axelsson,<br>2020     | no publicly available protocol                                                                                                                                                                                                                                                                      |
| Jarnefelt,<br>2020    | <a href="https://clinicaltrials.gov/ct2/show/NCT02523079">https://clinicaltrials.gov/ct2/show/NCT02523079</a>                                                                                                                                                                                       |
| Liu, 2020             | <a href="https://clinicaltrials.gov/ct2/show/NCT00645047?term¼Telemedicine&amp;recrs¼e&amp;cntry¼US&amp;state¼US%3ACA&amp;city¼SanþDiego&amp;rank¼1">https://clinicaltrials.gov/ct2/show/NCT00645047?term¼Telemedicine&amp;recrs¼e&amp;cntry¼US&amp;state¼US%3ACA&amp;city¼SanþDiego&amp;rank¼1</a> |
| Leterme,<br>2020      | <a href="https://clinicaltrials.gov/ct2/show/NCT02621775">https://clinicaltrials.gov/ct2/show/NCT02621775</a>                                                                                                                                                                                       |
| Watts, 2020           | no publicly available protocol                                                                                                                                                                                                                                                                      |
| Johansson,<br>2021    | <a href="https://www.clinicaltrials.gov/ct2/show/NCT02671019">https://www.clinicaltrials.gov/ct2/show/NCT02671019</a>                                                                                                                                                                               |
| Milgrom,<br>2021      | <a href="https://trialsearch.who.int/Trial2.aspx?TrialID=ACTRN12613000881730">https://trialsearch.who.int/Trial2.aspx?TrialID=ACTRN12613000881730</a>                                                                                                                                               |
| Meng, 2021            | no publicly available protocol                                                                                                                                                                                                                                                                      |
| Granberg,<br>2022     | URL: <a href="https://clinicaltrials.gov/ct2/show/NCT03328585">https://clinicaltrials.gov/ct2/show/NCT03328585</a><br>Identification Number: NCT03328585                                                                                                                                            |
| Lundstrom,<br>2022    | <a href="https://pubmed.ncbi.nlm.nih.gov/30185575/">https://pubmed.ncbi.nlm.nih.gov/30185575/</a>                                                                                                                                                                                                   |
| Peterson,<br>2022     | <a href="https://clinicaltrials.gov/ct2/show/NCT02290847">https://clinicaltrials.gov/ct2/show/NCT02290847</a>                                                                                                                                                                                       |
| Sadeghijoola,<br>2022 | The study was registered in the Iranian Registry for Clinical Trials with the reference number (IRCT20180918041065N1).                                                                                                                                                                              |
| Ying, 2022            | <a href="http://www.chictr.org.cn/historyversionpub.aspx?regno=ChiCTR2100049671">www.chictr.org.cn/historyversionpub.aspx?regno=ChiCTR2100049671</a>                                                                                                                                                |
| Kheirkhah,<br>2023    | Iranian Registry of Clinical Trials (IRCT20110228005931N9).                                                                                                                                                                                                                                         |

**eTable 6: Summary table of primary outcome data**

| Study           | Primary outcome name                                                                      | Remote CBT group |        |       | In-person CBT group |        |       |
|-----------------|-------------------------------------------------------------------------------------------|------------------|--------|-------|---------------------|--------|-------|
|                 |                                                                                           | n                | mean   | SD    | n                   | mean   | SD    |
| Heapy, 2017     | average pain intensity measured by the Numeric Rating Scale                               | 49               | -0.51* | 1.36  | 45                  | -0.44* | 1.42  |
| Anderson, 2013  | depression severity score measured by the Montgomery Åsberg Depression Rating             | 32               | 9.2    | 7.60  | 30                  | 13.50  | 8.70  |
| Andrews, 2011   | social phobia score measured by the Social Interaction Anxiety Scale                      | 14               | 44     | 15.9  | 11                  | 31.5   | 23.30 |
| Axelsson, 2020  | health anxiety score measured by Health Anxiety Inventory                                 | 92               | 20.7   | 9.3   | 90                  | 18     | 8.50  |
| Bergström, 2010 | panic disorder severity measured by Panic Disorder Severity Scale                         | 43               | 4.10   | 4.20  | 44                  | 5      | 5.3   |
| Bessell, 2012   | appearance concern measured by Derriford Appearance Scale-24                              | 22               | 34.91  | NR    | 23                  | 31.80  | NR    |
| Blom, 2015      | Insomnia severity measured by Insomnia Severity Index                                     | 22               | 9.30   | 4.80  | 23                  | 8.40   | 4.90  |
| Milgrom, 2021   | severity of depression measured by Beck Depression Inventory II                           | 39               | 15     | 10.71 | 39                  | 8.70   | 6.92  |
| Ying, 2022      | depressive symptoms measured by Center for Epidemiological Studies Depression Scale       | 110              | 14.80  | 4.45  | 110                 | 15.70  | 2.17  |
| Kaldo, 2008     | tinnitus distress measured by Tinnitus Reaction Questionnaire                             | 26               | 18     | 16.62 | 25                  | 15.70  | 2.17  |
| Peterson, 2022  | PTSD symptom severity measured by PTSD Checklist for DSM-5 (PCL-5)                        | 29               | 26     | 10.26 | 50                  | 26.2   | 17.02 |
| Lundstrom, 2022 | OCD severity measured by Yale-Brown Obsessive Compulsive Scale                            | 42               | 10.80  | 5.81  | 38                  | 11.7   | 5.49  |
| Carlbring, 2005 | physiological sensations experienced by anxiety measured by Body Sensations Questionnaire | 25               | 32.10  | 11.50 | 24                  | 31.90  | 10.70 |
| Conrad, 2015    | tinnitus distress measured by Tinnitus Handicap Inventory                                 | 28               | 26.67  | 20.75 | 36                  | 27.70  | 21.93 |
| de Boer, 2014   | pain catastrophizing measured by Pain catastrophizing scale                               | 22               | 11     | 11.49 | 24                  | 16.10  | 11.56 |
| Gollings, 2006  | body shape concern measured by Body Shape Questionnaire                                   | 20               | 97.90  | 36.70 | 19                  | 102.50 | 45.50 |
| Hedman, 2011    | social phobia measured by Clinical administered Liebowitz Social Anxiety Scale            | 64               | 32.10  | 23.10 | 62                  | 40.70  | 23.70 |

|                  |                                                                                             |     |        |       |     |        |       |
|------------------|---------------------------------------------------------------------------------------------|-----|--------|-------|-----|--------|-------|
| Jarnefelt, 2020  | severity of insomnia measured by Insomnia Severity Index                                    | 20  | 11.10  | 5.70  | 19  | 10.70  | 4.90  |
| Jasper, 2014     | tinnitus distress measured by Tinnitus Handicap Inventory                                   | 41  | 24.56  | 34.09 | 43  | 26.96  | 21.79 |
| Johansson, 2021  | number of standard drinks consumed measured by time-line follow-back (TLFB) method          | 150 | 13.10  | 9.69  | 151 | 11.50  | 8.84  |
| Kiropoulos, 2008 | panic severity measured by Panic disorder severity scale                                    | 45  | 9.92   | 5.88  | 35  | 9.24   | 5.65  |
| Ye, 2016         | sleep onset latency                                                                         | 27  | 36.67  | 18.40 | 26  | 33.46  | 18.48 |
| Leterme, 2020    | trait anxiety measured by State-Trait Anxiety Inventory                                     | 39  | 39.80  | 11.46 | 38  | 43.50  | 15.49 |
| Lancee, 2016     | insomnia severity measured by Insomnia Severity Index                                       | 21  | 12.40  | 4.60  | 26  | 7.50   | 3.6   |
| Stubbings, 2013  | depression, anxiety and stress measured by Depression Anxiety and Stress Scale              | 14  | 6.74   | 5.93  | 11  | 10.31  | 7.91  |
| Thase, 2018      | depression severity measured by Hamilton Rating Scale for Depression                        | 77  | 7.90   | 5.90  | 77  | 7.50   | 6     |
| Wagner, 2014     | depression severity measured by Beck Depression Inventory II                                | 17  | 9.28   | 7.50  | 20  | 14.47  | 9.33  |
| Paxton, 2007     | body dissatisfaction measured by Body Shape Questionnaire                                   | 24  | 89.70  | 28.60 | 32  | 95.10  | 31.30 |
| Vallejo, 2015    | global impact fibromyalgia measured by Fibromyalgia Impact Questionnaire                    | 20  | 51.52  | 15.25 | 20  | 65.14  | 17.91 |
| Zerwas, 2017     | abstinence from binge eating and purging measured by Eating Disorders Examination Interview | 89  | NR**   | NR    | 90  | NR**   | NR    |
| Kenardy, 2003    | panic-anxiety composite score                                                               | 50  | -1.21  | 0.76  | 45  | -1.52  | 0.70  |
| Azimi, 2019      | Gross memory impairment measured by Rivermead Behavioural Memory Test                       | 15  | 96.07  | 2.18  | 15  | 96.80  | 4.70  |
| Alegria, 2014    | severity of depression measured by the Patient Health Questionnaire-9 (PHQ-9)               | 84  | -2.30* | 9.23  | 84  | -2.98* | 8.99  |
| Franklin, 2018   | sleep problems measured by Pittsburgh Sleep Quality Index (PSQI).                           | 11  | 10.5   | 5.5   | 7   | 11.8   | 5.5   |
| Frueh, 2007      | PTSD symptom severity measured by PTSD Checklist-M (PCLM)                                   | 17  | 61.43  | 14.6  | 21  | 60.56  | 9.8   |
| Maieritsch, 2016 | PTSD severity measured by the Clinician-                                                    | 45  | 50.02  | 22    | 45  | 48.24  | 21.42 |



|                     |                                                                                         |     |        |       |     |        |       |
|---------------------|-----------------------------------------------------------------------------------------|-----|--------|-------|-----|--------|-------|
|                     | Administered PTSD Scale (CAPS)                                                          |     |        |       |     |        |       |
| Liu, 2020           | PTSD severity measured by CAPS                                                          | 103 | 56.6   | 28.5  | 104 | 57.3   | 26.9  |
| Morland, 2014       | PTSD severity measured by CAPS                                                          | 61  | 56.2   | 18    | 64  | 57.7   | 19.8  |
| Mitchell, 2008      | Binge eating frequency measured by Eating Disorder Examination (EDE)                    | 62  | 11.8   | 21.8  | 66  | 6.6    | 14.9  |
| Himelhoch, 2013     | depression symptom severity Hamilton measured by Depression Rating Scale                | 16  | 16.30  | 8.60  | 18  | 15.90  | 7.20  |
| Mohr, 2012          | Depression measured by Hamilton Depression Rating Scale                                 | 163 | 15.06  | 1.24  | 162 | 12.14  | 0.66  |
| Sadeghijoo la, 2022 | Frequency of hot flashes measured by Kupperman hot flash index                          | 20  | 20.09  | 7.84  | 20  | 19.32  | 7.21  |
| McAndrew, 2018      | Role Physical measured by Role Physical Sub-Scale VR-36                                 | 43  | 35.6   | 13.2  | 42  | 35     | 11    |
| Egede, 2015         | Depression measured by Beck Depression Inventory                                        | 120 | 12.70  | NR    | 121 | 8.93   | NR    |
| Choi, 2014          | Depression measured by Hamilton Rating Scale for Depression                             | 56  | 11.08  | 7.49  | 63  | 14.16  | 7.14  |
| Luxton, 2016        | Depression measured by Beck Depression Inventory II                                     | 62  | 14.76  | 12.89 | 59  | 15.00  | 12.61 |
| Glueckauf, 2012     | Depression measured by Center for Epidemiological Studies Depression Scale              | 7   | 4.67   | 2.07  | 7   | 9.00   | 5.70  |
| Kheirkhah, 2023     | Depression measured by Beck depression questionnaire                                    | 30  | 14.17  | 9.57  | 30  | 15.04  | 11.34 |
| Watts, 2020         | Working Alliance Scores measured by Working Alliance Inventory                          | 69  | 240.73 | 16.05 | 79  | 233.96 | 13.76 |
| Hall, 2017          | CFS Symptoms measured by Chalder Fatigue Scale                                          | 56  | 14.07  | 4.88  | 44  | 12.39  | 6.33  |
| Lovell, 2006        | Obsessive compulsive disorder measured by the Yale Brown obsessive compulsive checklist | 36  | 14.20  | 7.80  | 36  | 13.30  | 8.60  |
| Burgess, 2012       | Chronic Fatigue Syndrome measured by Chalder Fatigue Scale                              | 45  | 7.89   | 3.75  | 35  | 6.83   | 4.57  |

\* mean change was reported; \*\* Cohen's  $d=0.07$ , 95%CI= [-0.22 to 0.37] was reported; DSM V= Diagnostic and Statistical Manual of Mental Disorders, Fifth Edition; NR = not reported; OCD = Obsessive Compulsive Disorder; PTSD = Post-traumatic Stress Disorder; USA= United States of America

Note: in this table, end of study mean and SD was reported.

eFigure 3: Contour-enhanced funnel plot of primary outcome effect estimates

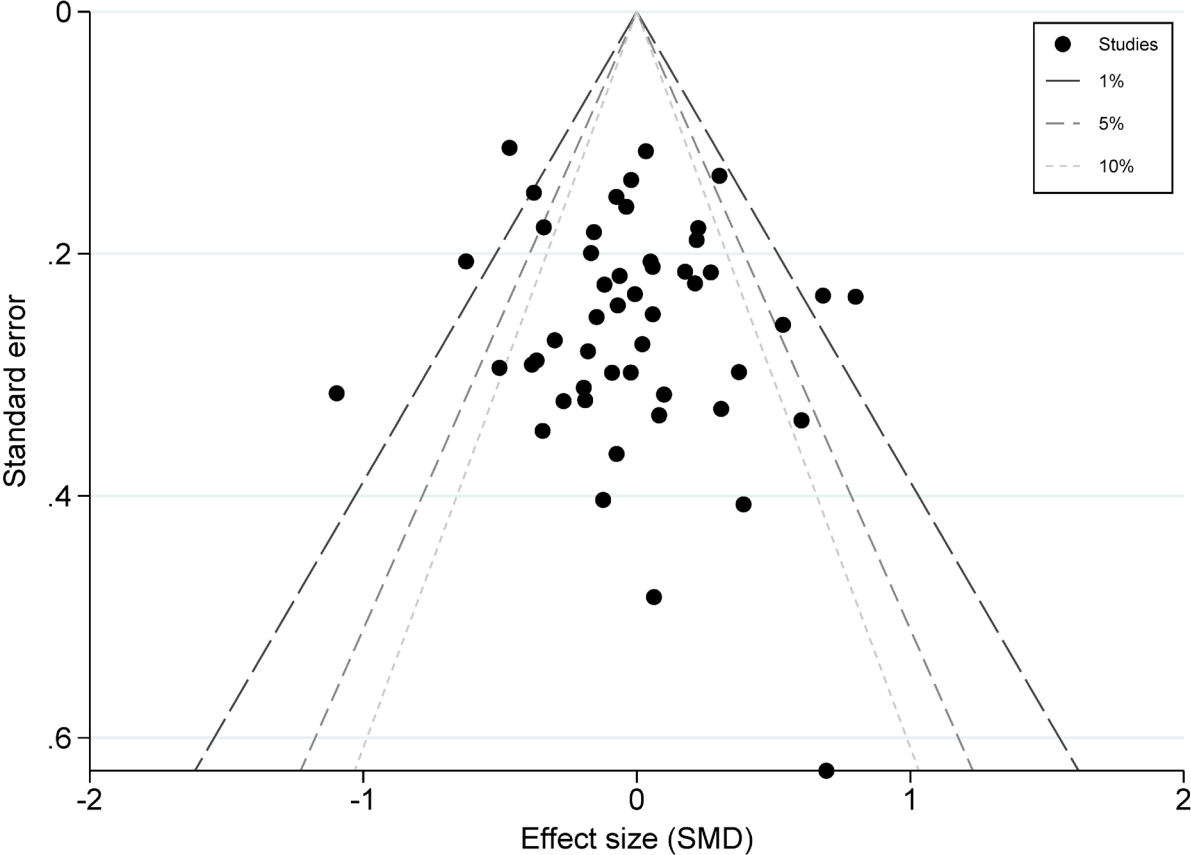

P-value for Egger's test: 0.366

**eFigure 4: Effect on primary outcome among patients that received in-person vs. remote CBT, using end-of-study scores**

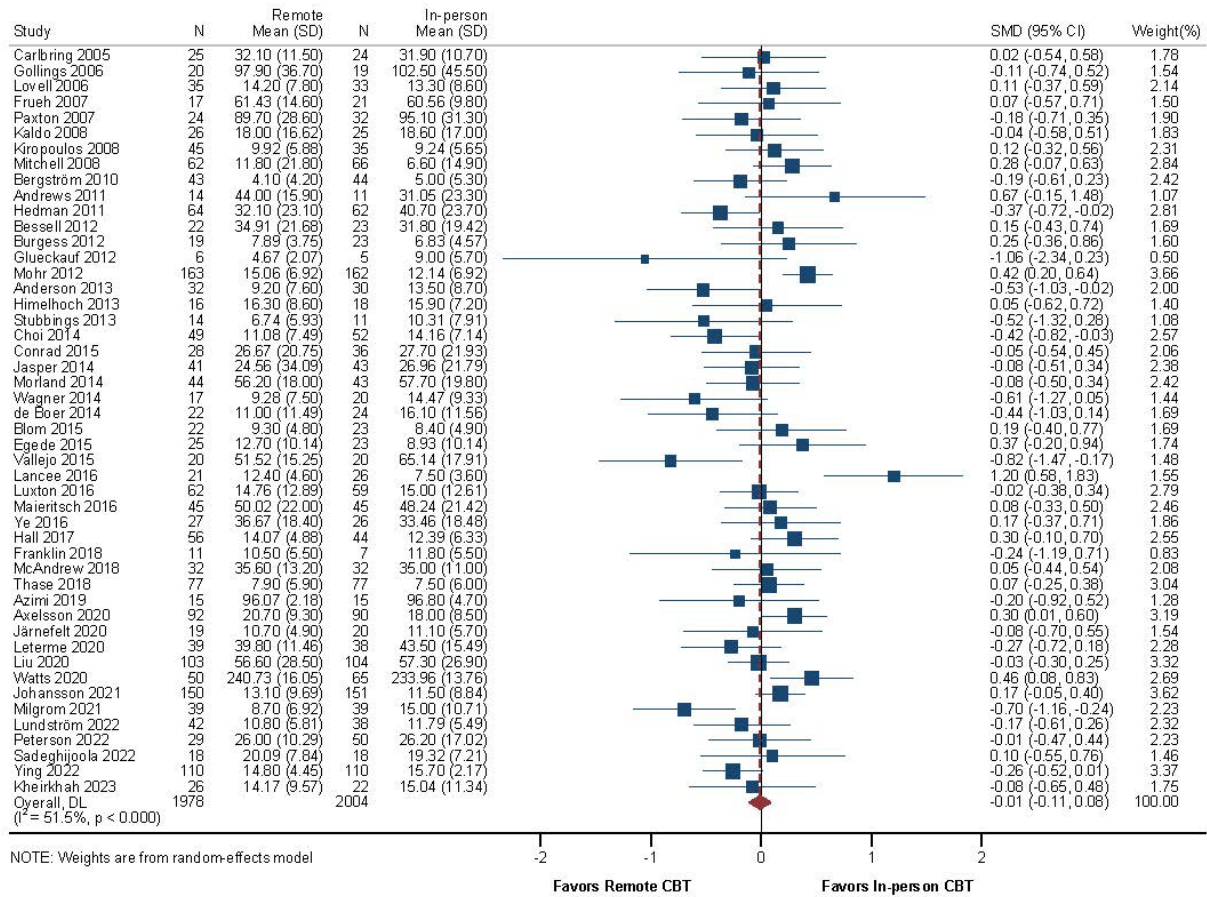

**eFigure 5: Subgroup analysis for effectiveness and clinical condition**

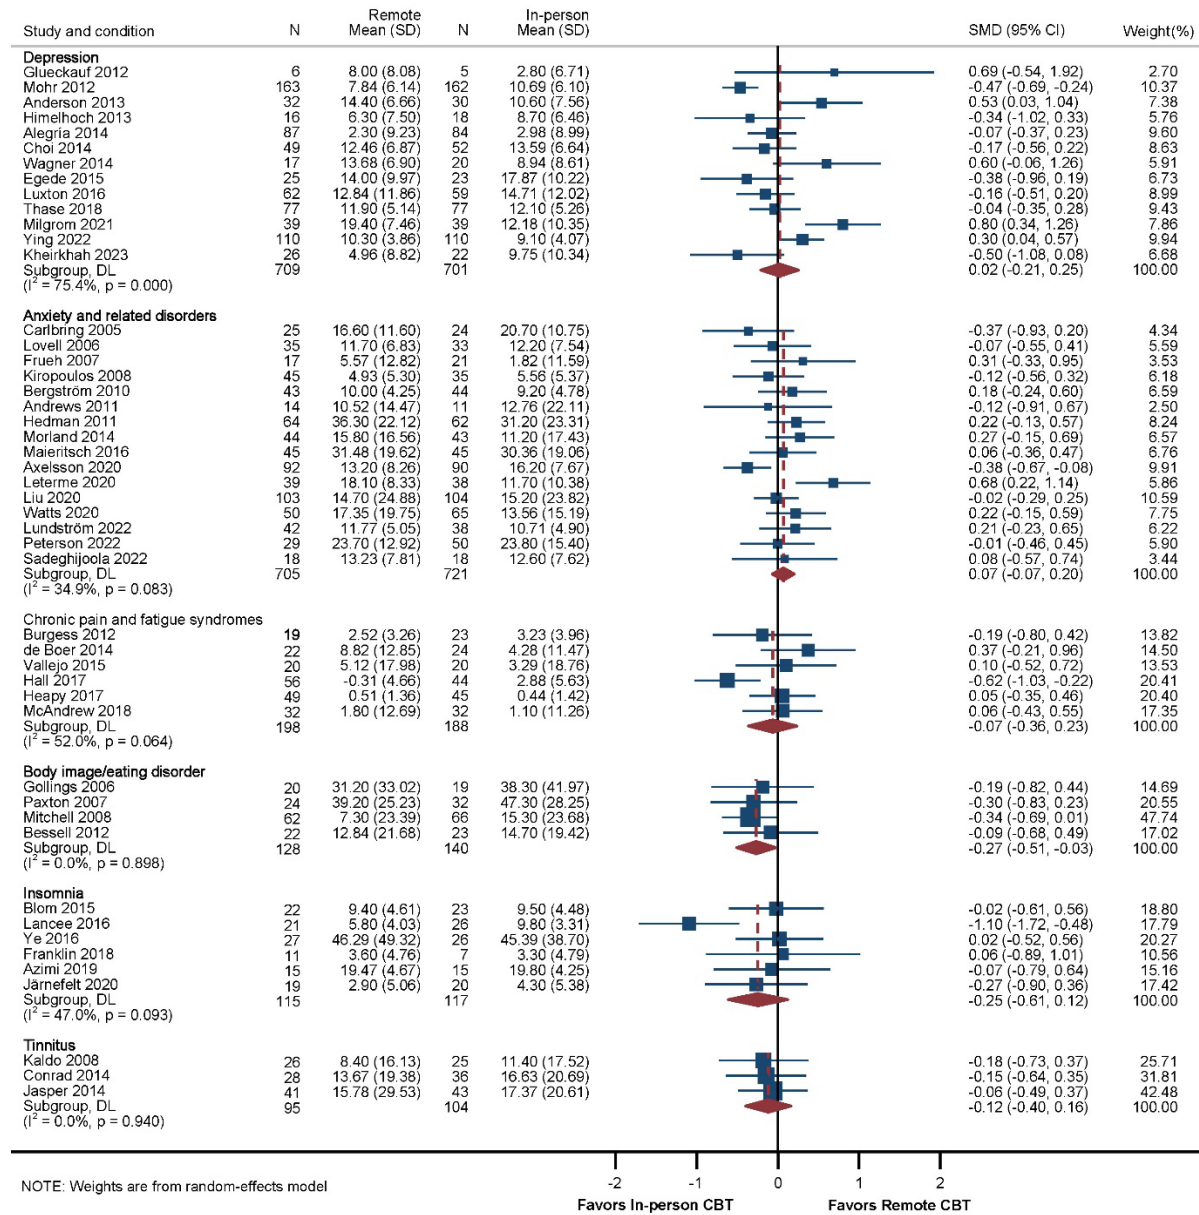

eFigure 6: Subgroup analysis for individual vs. group CBT

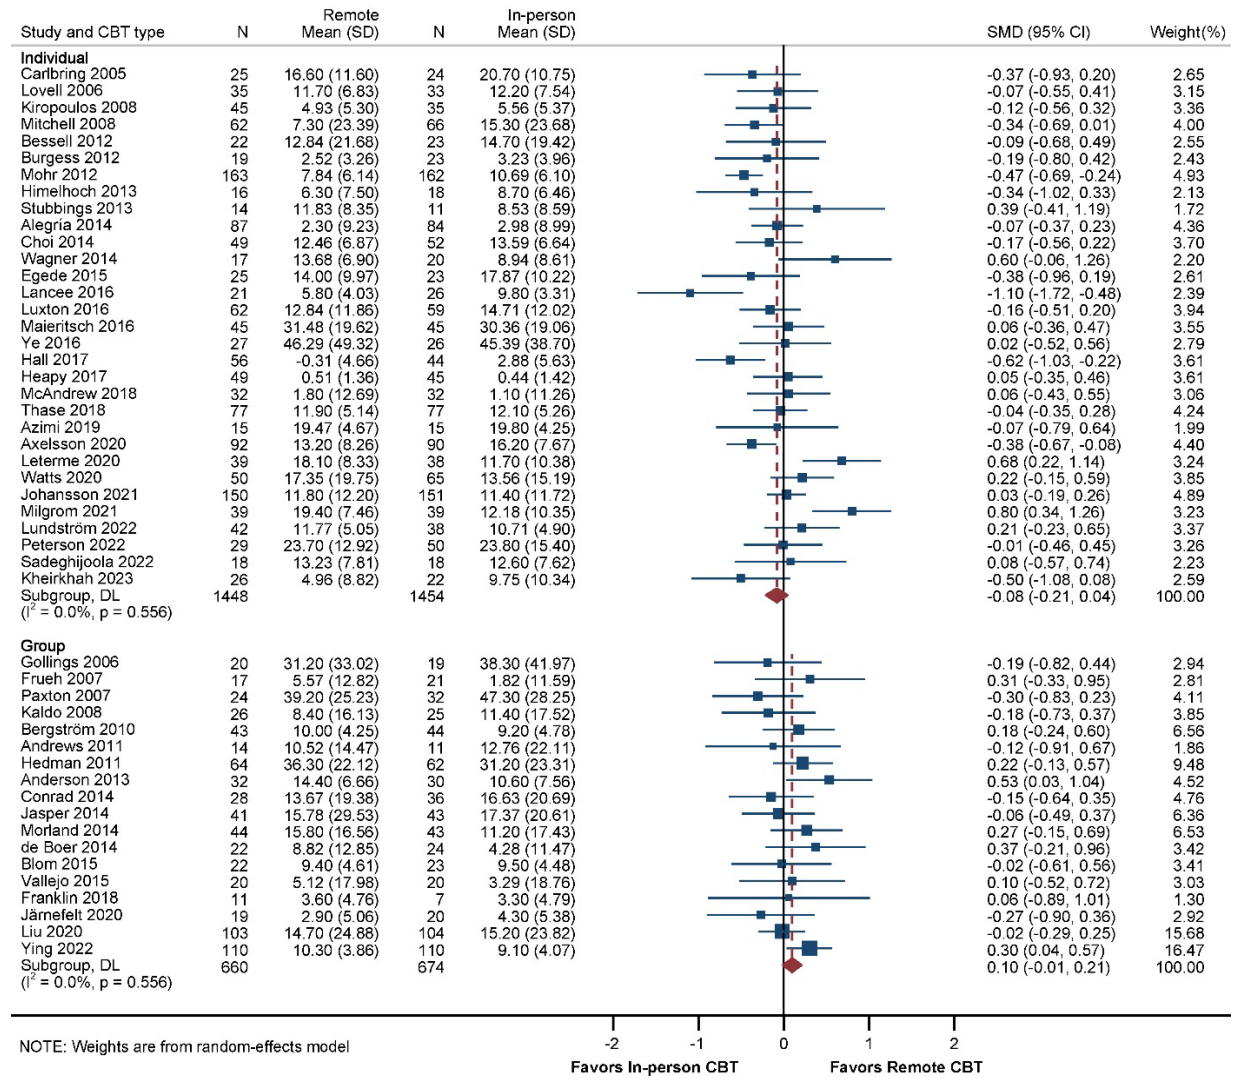

**eFigure 7: Subgroup analysis for individual vs. group CBT and overall risk of bias**

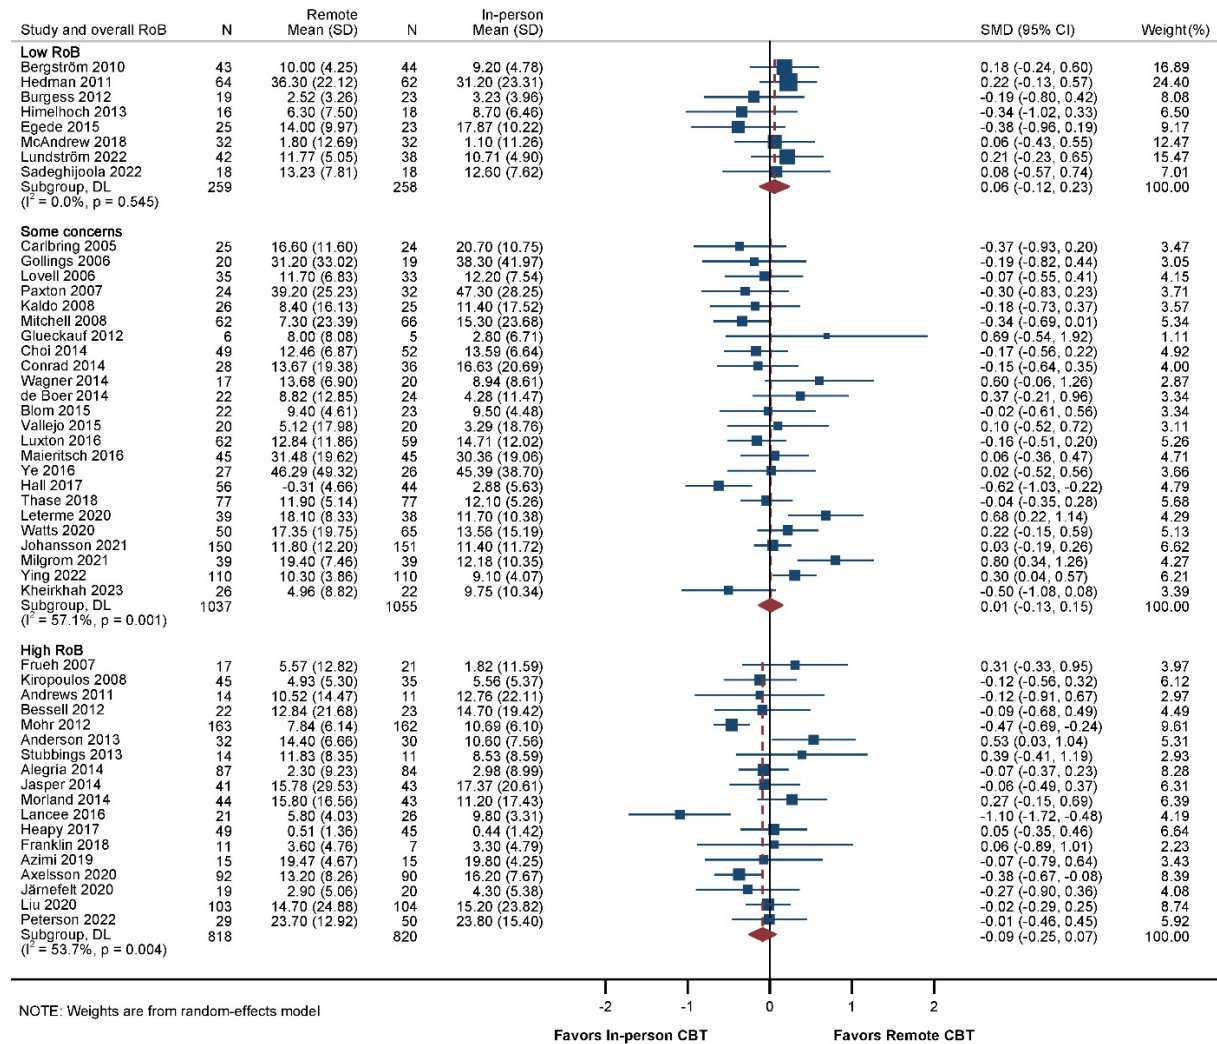



eFigure 8: Subgroup analysis for effectiveness and risk of bias for randomization sequence

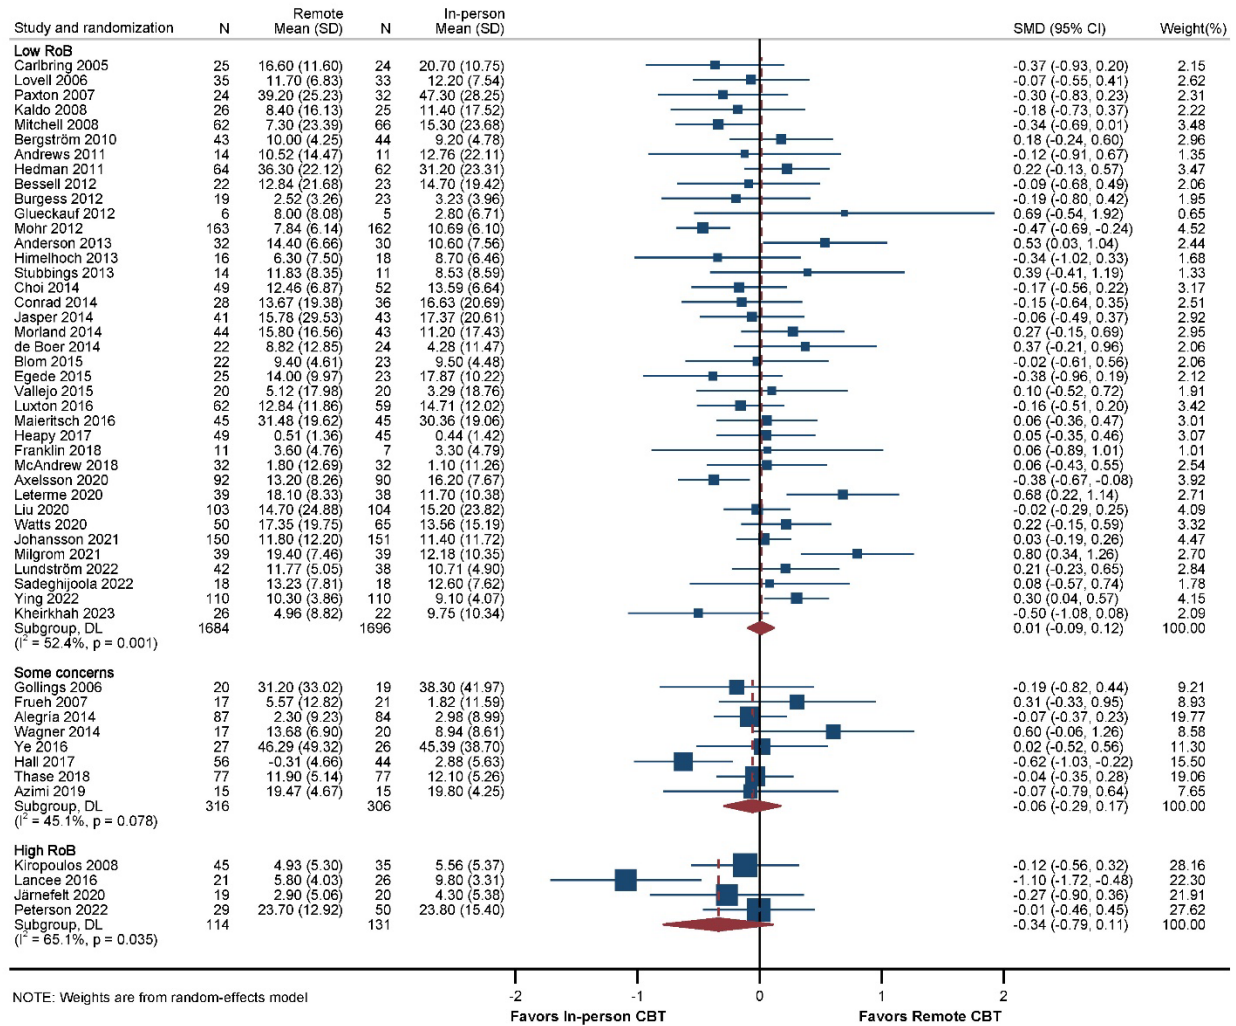





**eFigure 10: Subgroup analysis for effectiveness and risk of bias for measurement outcome**

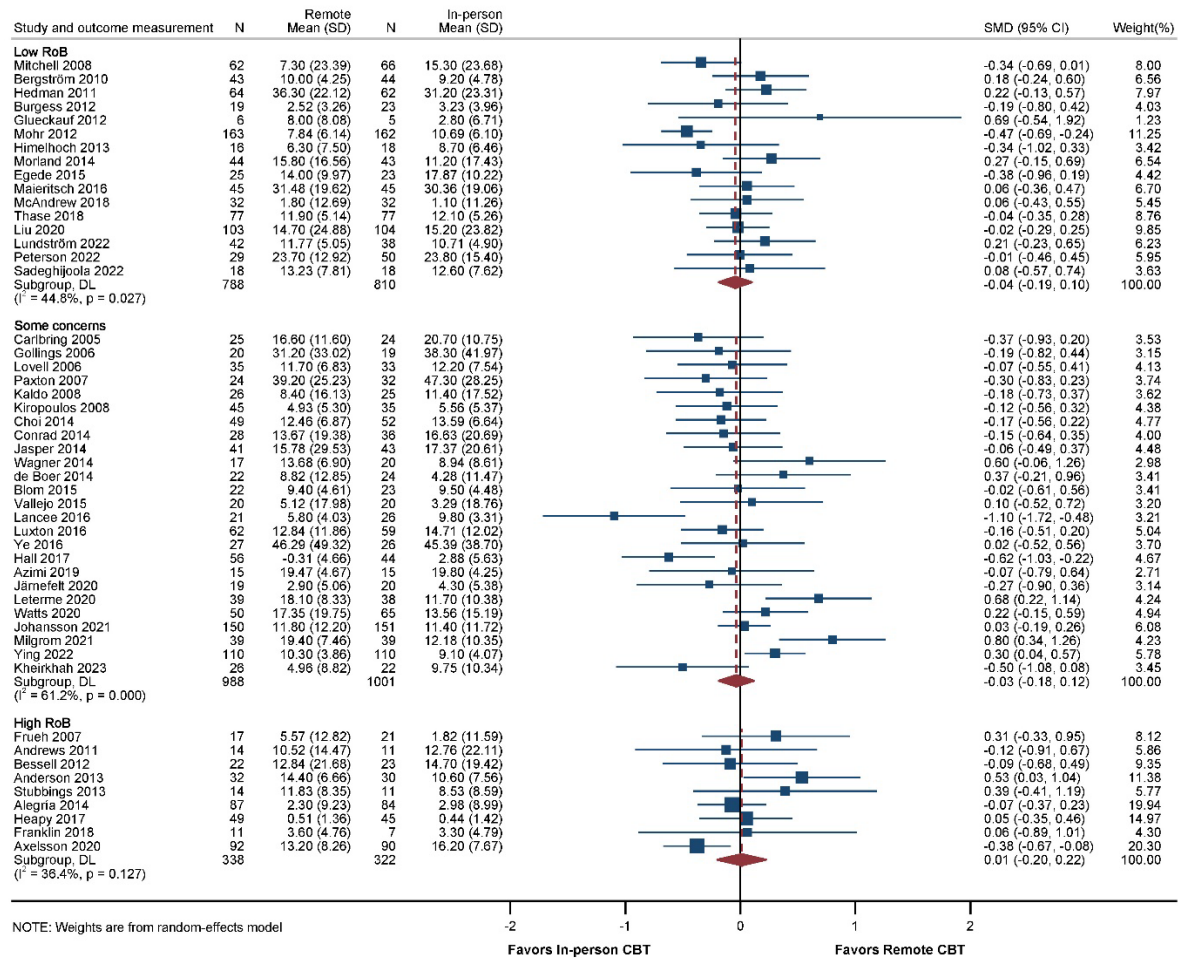

**eFigure 11: Subgroup analysis for effectiveness and risk of bias for selection of the reported results**

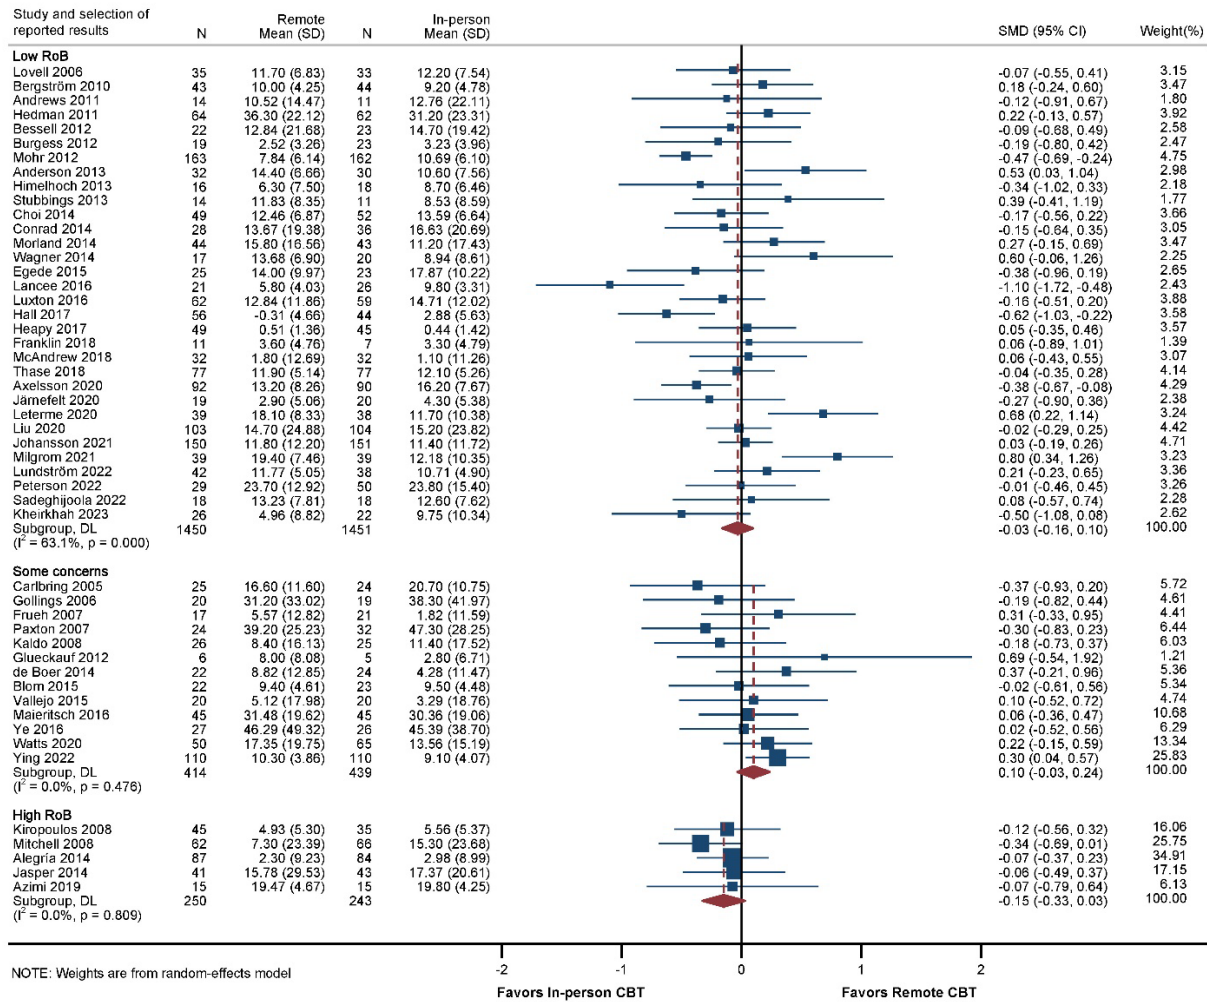

eFigure 12: Meta-regression for length of follow-up and treatment effect

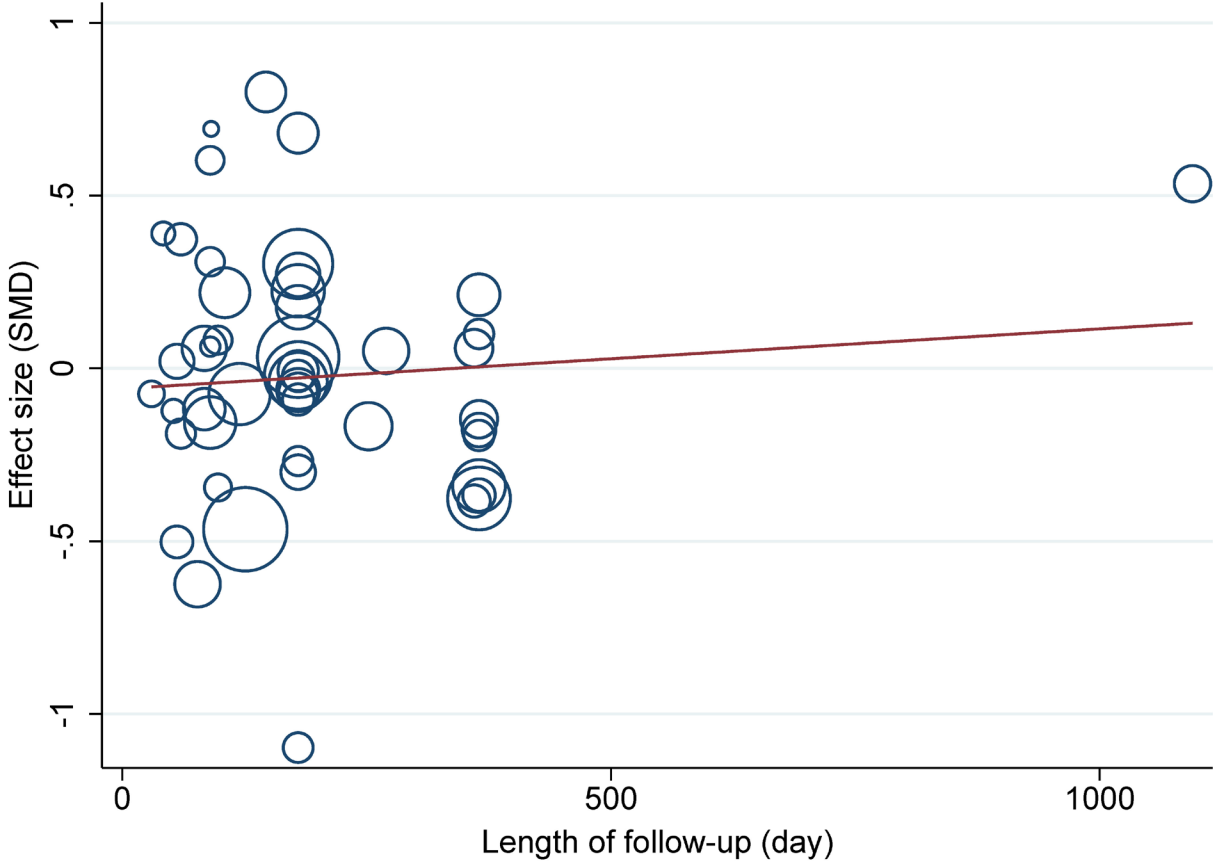

p-value for the slope = 0.565

eFigure 13: Meta-regression for length of follow-up and treatment effects without outlier

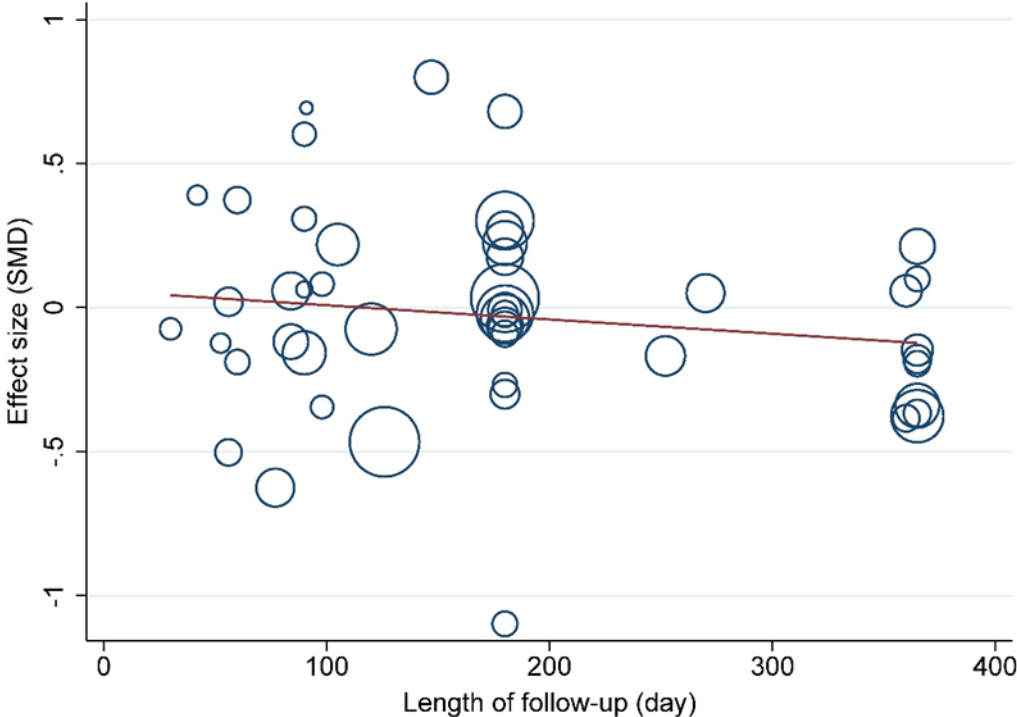

p-value for the slope = 0.289

**eFigure 14: Reduction in depressive symptoms on the 63-point Beck Depression Inventory-II among patients with depression who received therapist-guided, remote vs. in-person CBT**

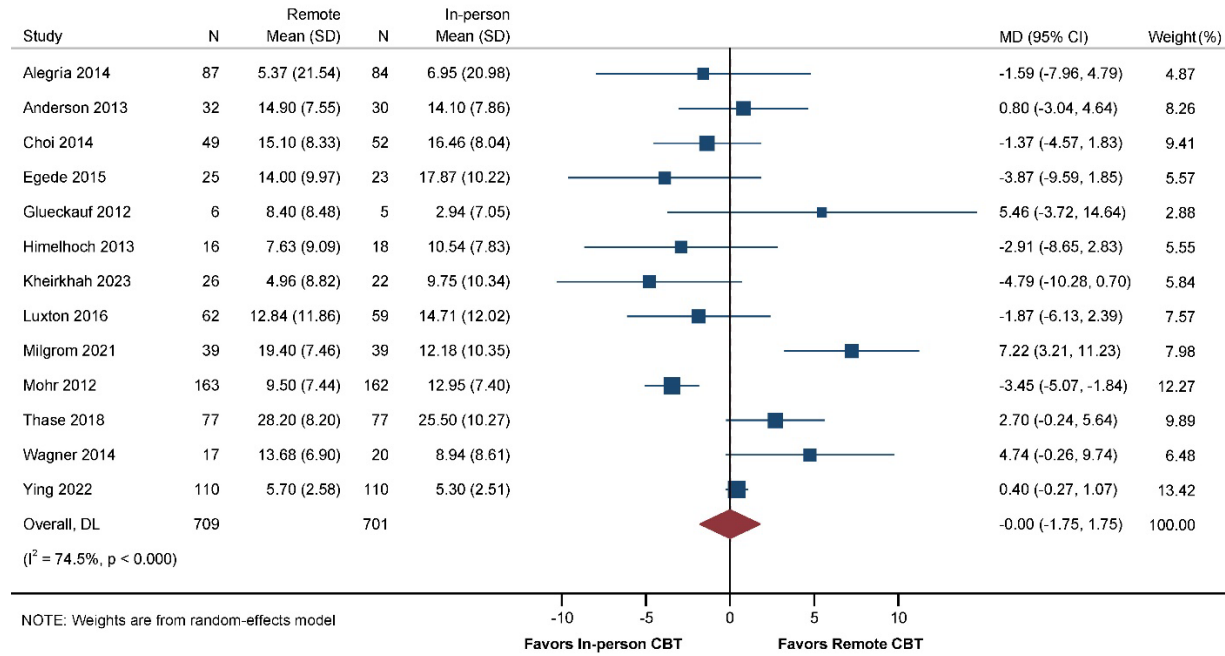

The minimally important difference in score on the 63-point Beck Depression Inventory-II is 5-points.
